1 **The Arabian camel, *Camelus dromedarius* interferon epsilon: functional expression, *in vitro***  
2 **refolding, purification and cytotoxicity on breast cancer cell lines MDA-MB-231 and MCF-7**

3 Manal Abdel-Fattah<sup>1</sup>, Hesham Saeed <sup>1\*</sup>, Lamiaa El-Shennawy<sup>2</sup>, Manal Shalaby<sup>3</sup>, Amira M.

4 Embaby <sup>1</sup>, Farid Ataya<sup>4,5</sup>, Hoda E.Mahmoud<sup>1</sup>, Ahmed Hussein<sup>1</sup>

5 <sup>1</sup> Department of Biotechnology, Institute of Graduate Studies and Research, Alexandria University,  
6 Alexandria, Egypt.

7 <sup>2</sup> Department of Environmental Studies, Institute of Graduate Studies and Research, Alexandria  
8 University, Alexandria, Egypt.

9 <sup>3</sup> Genetic Engineering and Biotechnology Research Institute (GEBRI), City for Scientific Research  
10 and Technology Applications, New Borg Al-Arab City, Alexandria, Egypt.

11 <sup>4</sup> Biochemistry Department, College of Science, Riyadh , King Saud University, KSA.

12 <sup>5</sup> National Research Centre, Dokki, Giza, Egypt.

13 \* Correspondence author

14 **E-Mail:** [hsaeed1@ksu.edu.sa](mailto:hsaeed1@ksu.edu.sa);

15 Tel.:002035914285

Fax: 002035920956

16

## 17 **Abstract**

18 The current study highlights for the first time cloning, overexpression, purification, and assessing  
19 the cytotoxicity of the novel interferon epsilon (IFN $\epsilon$ ), from the Arabian camel *Camelus*  
20 *dromedarius*, against two human breast cancer cell lines MDA-MB-231 and MCF-7. Full-length  
21 cDNA encoding interferon epsilon (IFN $\epsilon$ ) was isolated and cloned from the liver of the Arabian  
22 camel, *C. dromedarius* using reverse transcription-polymerase chain reaction. The sequence  
23 analysis of the camel IFN $\epsilon$  cDNA showed a 582-bp open reading frame encoding a protein of 193  
24 amino acids with an estimated molecular weight of 22.953 kDa. A BLAST search analysis revealed  
25 that the *C. dromedarius* IFN $\epsilon$  shared high sequence identity with the IFN genes of other species,  
26 such as *Camelus ferus*, *Vicugna pacos*, and *Homo sapiens*. Expression of the camel IFN $\epsilon$  cDNA in  
27 *Escherichia coli* gave a fusion protein band of 22.73 kDa after induction with either isopropyl  $\beta$ -D-  
28 1-thiogalactopyranoside or lactose for 5 h. Recombinant IFN $\epsilon$  protein was overexpressed in the  
29 form of inclusion bodies that were easily solubilized and refolded using SDS and KCl. The  
30 solubilized inclusion bodies were purified to apparent homogeneity using nickel affinity  
31 chromatography. We examined the effect of IFN $\epsilon$  on two breast cancer cell lines MDA-MB-231  
32 and MCF-7. In both cell lines, IFN $\epsilon$  inhibited cell survival in a dose dependent manner as observed  
33 by MTT assay, morphological changes and apoptosis assay. Caspase-3 expression level was found  
34 to be increased in MDA-MB-231 treated cells as compared to untreated cells.

35  
36  
37 **Keywords:** *Camelus dromedarius*; cloning; expression; refolding; interferon; cytotoxicity

38

## 39 **Introduction**

40 The term interferon (IFN) was first described by Alick Isaacs and Jean Lindemann in 1957 at the  
41 National Institute for Medical Research in London. They described an antiviral agent produced by  
42 virally infected chick cells, and they called it interferon (IFN), a substance that interferes with  
43 influenza and vaccinia virus replication [1]. Since then, the efforts to discover, characterize, and  
44 develop new interferons as major therapeutic proteins have continued for over 60 years [2]. IFNs  
45 are members of a large cytokine family of evolutionarily conserved pleiotropic regulators of cellular  
46 functions; they are relatively low-molecular weight signaling proteins (20–25 kDa) usually  
47 glycosylated and produced by a variety of cells, such as epithelia, endothelia, stroma, and cells of  
48 the immune system [3-5]. The expression of IFNs is induced by a variety of different stimuli  
49 associated with viral infections, bacteria, parasites, inflammation, and tumorigenesis [6]. IFNs,  
50 therefore, induce a diverse range of biological functions and responses, including cell proliferation  
51 and differentiation, inflammation, chemotaxis, immune cell (natural killer cells and macrophages)  
52 activation, and apoptosis [7, 8]. The key to understanding these regulatory proteins lies in the  
53 recognition of their pleiotropism, overlapping activities, functional redundancies, and side effects  
54 [3]. Based on the type of receptors they interact with for signal transduction, IFNs are classified into  
55 three major types namely, type I, II, and III, which have different gene and protein structures and  
56 biological activities [9]. The mammalian type I IFNs represents a large family of related proteins,  
57 mainly virus-inducible, divided into eight subfamilies named  $\alpha$ ,  $\beta$ ,  $\omega$ ,  $\delta$ ,  $\epsilon$ ,  $\nu$  and  $\kappa$  [10, 11]. Besides  
58 the autocrine activation of antiviral responses, type I IFNs function systematically to induce an  
59 antiviral state in the surrounding and distal cells [12, 13]. In combination with chemo and radiation  
60 therapies, interferon therapy is used as a treatment of some malignant diseases, such as hairy cell  
61 leukemia, chronic myeloid leukemia, nodular lymphoma, and cutaneous T-cell lymphoma [14]. The

62 recombinant IFN- $\alpha$ 2b can be used for the treatment of patients with recurrent melanomas [15].

63 Hepatitis B, hepatitis C, and HIV are treated with IFN- $\alpha$  often in combination with other antiviral  
64 drugs [16, 17].

65 One of the most recently discovered interferon is the interferon epsilon (IFN $\epsilon$ ). Signal transduction  
66 by IFN $\epsilon$  is mediated through binding to the interferon  $\alpha/\beta$  receptor (IFNAR), despite its low  
67 sequence homology with  $\alpha$ - and  $\beta$ -type interferons. Although binding to the same heterodimeric  
68 receptor pair, they evoke a broad range of cellular activities, affecting the expression of numerous  
69 genes and resulting in profound cellular changes [12, 18-20]. The expression of IFN $\epsilon$  is neither  
70 induced by a pattern recognition receptor pathway nor by an exposure to viral infection [21]. Unlike  
71 other type-I IFNs, IFN $\epsilon$  is constitutively expressed in the lung, brain, small intestine, and  
72 reproductive tissue; thus, it is thought to play a role in reproductive function, in either viral  
73 protection or early placental development in placental mammals [18, 19]. IFN $\epsilon$  has high amino acid  
74 sequence homology with other type-I interferons, of which IFN- $\beta$  is the closest paralog, and they  
75 share 38% identical residues. A common structural feature of IFN $\epsilon$  is the lack of a disulfide linkage  
76 and the presence of two glycosylation sites represented by asparagine 74 and 83. Many IFNs genes  
77 have been cloned and characterized from a variety of species such as human, pig, mouse, dog, cat,  
78 cattle, chicken, turkey, goose, zebra fish, and Atlantic salmon [22-25]. However, the information  
79 about the IFN $\epsilon$  from the Arabian one-humped camel, *Camelus dromedarius*, has not been reported  
80 yet. This domesticated camel is one of the most important animals in the Arabian Peninsula, having  
81 high cultural and economic value. In Saudi Arabia, it comprises 16% of the animal biomass and is  
82 considered as the main source of meat [26, 27]. The aim of the present study was the isolation of  
83 full-length *C. dromedarius* IFN $\epsilon$  gene, followed by its expression in *Escherichia coli*, *in vitro*  
84 refolding of the recombinant protein, purification, and characterization of the purified IFN $\epsilon$  protein.

85 Cytotoxicity and apoptosis assays were then performed to define the effect of the purified  
86 recombinant IFN $\epsilon$  protein on human cancer cell lines. The results of this study contribute towards  
87 the importance of discovering and characterizing IFN $\epsilon$  from this unique Arabian camel, and  
88 propose its potential use for the treatment of cancer.

## 89 **Materials and methods**

### 90 **Chemicals and reagents**

91 All chemicals and reagents were of molecular biology, analytical, or chromatographic grade. Water  
92 was de-ionized and milli-Q-grade.

### 93 **Tissue collection and RNA isolation**

94 Liver tissues (2 g) from adult male one-humped Arabian camel, *C. dromedarius*, were collected  
95 from a slaughter house located in the north of Riyadh City, Kingdom of Saudi Arabia. The animals  
96 were sacrificed under the observation of a skilled veterinarian, and the liver samples were taken and  
97 immediately submerged in 5 mL of RNA later<sup>®</sup> solution (Ambion, Courtabeuf, France) to preserve  
98 the integrity of RNA. The samples were kept at 4 °C overnight and thereafter stored at –80 °C until  
99 used for RNA isolation. The liver samples were removed from –80 °C and left at room temperature  
100 until thawed completely. Fifty milligrams were homogenized in 0.5 mL RLT lysis solution  
101 supplemented with 1% 2-mercaptoethanol using a rotor-stator homogenizer (MEDIC TOOLS,  
102 Switzerland). Total RNA was isolated and purified using the RNeasy Mini Kit (Qiagen, Germany),  
103 with a DNase digestion step following the manufacturer's protocol. The elution step was performed  
104 using 50  $\mu$ L nuclease free water. The concentration, purity, and integrity of the isolated purified  
105 total RNA were determined using the Agilent 2100 Bioanalyzer System and Agilent total RNA

106 analysis kit, according to the manufacturer's protocols (Agilent Technologies, Waldbronn,  
107 Germany).

## 108 **First strand cDNA synthesis and amplification of camel *IFN $\epsilon$* gene**

109 Total RNA, isolated previously from adult male one-humped Arabian camel, *C. dromedaries*, was  
110 used in the current study as a source for camel *IFN $\epsilon$*  gene. Two micrograms of total RNA were  
111 reverse transcribed into the first strand cDNA using the ImProm-II Reverse Transcription System  
112 (A3800, Promega, Madison, USA) according to the manufacturer's protocol and used as a template  
113 for the amplification of the full-length camel *IFN $\epsilon$*  cDNA. A polymerase chain reaction (PCR) was  
114 conducted in a final volume of 50  $\mu$ L, containing 25  $\mu$ L 2X high-fidelity master mix (GE  
115 Healthcare, USA), 3  $\mu$ L (30 pmol) of each *IFN $\epsilon$*  gene forward primer that contains an *EcoRI*  
116 restriction site (5'-GAATTC ATGATTAACAAGCCTTTCTT-3') and a reverse primer that  
117 contains a *HindIII* restriction site (5'- AAGCTTAGGATCCATTCCTTGTTTGC-3'), and 5  $\mu$ L  
118 cDNA. The PCR amplification was performed using the following reaction conditions: 1 cycle at 95  
119  $^{\circ}$ C for 5 min, followed by 30 cycles at 95  $^{\circ}$ C for 30 s, 55  $^{\circ}$ C for 30 s, and 72  $^{\circ}$ C for 1 min. A final  
120 extension step was carried out at 72  $^{\circ}$ C for 5 min. The PCR products were resolved in a 1.5%  
121 agarose gel stained with 0.5  $\mu$ g/mL ethidium bromide.

## 122 **Cloning and sequencing of the full-length camel *IFN $\epsilon$* cDNA**

123 The PCR product was first cloned into the pGEM<sup>®</sup>-T Easy vector (Promega Co. Cat #A1360) to  
124 facilitate the sequencing process and subcloning into the pET28a (+) expression vector. The ligation  
125 reaction was carried out in a clean sterile 1.5-mL eppendorf tube containing 4  $\mu$ L of the PCR  
126 product, 1  $\mu$ L (50 ng) of pGEM<sup>®</sup>-T-Easy vector (Promega, USA), 1  $\mu$ L of 10X ligase buffer, and 1  
127 U of ligase enzyme. The final volume of the reaction was adjusted to 10  $\mu$ L by the addition of

128 nuclease free water. The reaction tubes were kept at 16 °C overnight, after which 5 µL was used to  
129 transform the *E. coli* JM109 competent cells, according to Sambrook et al. (1989) [28]. Screening  
130 was carried out on the selective LB/IPTG/X-gal/Ampicillin/agar plates. The recombinant plasmids  
131 were prepared from some positive clones using the PureYield Plasmid Miniprep System (Cat  
132 #A1222, Promega, Madison, USA). The sequencing of the cloned insert was carried out according  
133 to Sanger et al. 1977 [29] using the T7 (5'-TAATACGACTCACTATAGGG-3') and SP6 (5'-  
134 TATTTAGGTGACACTATAG-3') sequencing primers. The sequence analysis was carried out  
135 using the DNASTar, BioEdit, and Clustal W programs.

### 136 **Phylogenetic tree and structure modeling analysis**

137 A phylogenetic tree analysis was constructed according to Dereeper et al. [30], using the  
138 Phylogeny.fr software (<http://www.Phylogeny.fr>). The nucleotide sequences for the Arabian camel  
139 IFNε cDNA was analyzed using the basic local alignment search tool (BLAST) programs BLASTn,  
140 BLASTp (<http://www.ncbi.nlm.nih.gov>), and a multiple sequence alignment was carried out using  
141 the ClustalW, BioEdit, DNASTar, and Jalview programs. The protein sequence was obtained by  
142 translating the cDNA nucleotides sequence by using a translation tool at the ExPasy server  
143 (<http://web.expasy.org/translate/>). The protein sequence was submitted to the Swiss-Model server  
144 for structure prediction, and the structural data were analyzed by the PDB viewer program. Finally,  
145 the predicted 3D structure models were built based on the multiple threading alignments by using  
146 the local threading meta-server (LOMET) and iterative TASSER assembly simulation [31, 32].

### 147 **Sub-cloning into pET-28a (+) vector**

148 The IFN $\epsilon$  cDNA insert cloned into the pGEM-T-Easy plasmid was released using the *EcoRI* and  
149 *HindIII* restriction enzymes (2 units each) according to Sambrook et al. (1989) [28]. The released  
150 insert was purified from the agarose gel using the QIAquick Gel Extraction Kit (Cat. # 28704,  
151 QIAGEN) and sub-cloned into the pET-28a (+) expression vector. The plasmid pET-28a (+)  
152 (Novagen) carries an N-terminal His-Tag/thrombin/T7 configuration, and the expression of the  
153 cloned gene is under the control of a T7 promoter. A 2- $\mu$ g aliquot of plasmid pET-28a (+) was  
154 digested with 2 units of *EcoRI* and *HindIII* at 37 °C overnight, after which the digestion reaction  
155 was terminated by heating the tubes at 65 °C for 15 min. The linearized plasmid was treated with 2  
156 units of shrimp alkaline phosphatase (Promega, Madison, USA) at 37 °C for 30 min. Finally, the  
157 reaction was terminated by incubation at 70 °C for 10 min. The ligation reaction was carried out in a  
158 tube containing 2  $\mu$ L (50 ng) of pET28a (+), 2  $\mu$ L (100 ng) of IFN $\epsilon$  cDNA insert, 1  $\mu$ L 10X ligase  
159 buffer, and 1  $\mu$ L (2 units) of ligase enzyme. The final volume was adjusted to 10  $\mu$ L by the addition  
160 of nuclease free water, and the tube was incubated at 16 °C overnight. Subsequently, 5  $\mu$ L of the  
161 ligation reaction was used to transform *E. coli* BL21(DE3) pLysS (Cat. # P9801, Promega, USA)  
162 competent cells, according to Sambrook et al. (1989) [28]. The recombinant *E. coli* BL21(DE3)  
163 pLysS harboring the pET-28a (+) vector was screened on the selective LB/IPTG/X-  
164 gal/Kanamycin/agar plates and by using the colony PCR strategy utilizing the IFN $\epsilon$  gene-specific  
165 primers. The recombinant plasmids were isolated from the positive clones using the Pure Yield  
166 Plasmid Miniprep System (A1222, Promega, USA), and some potential positive plasmids  
167 containing the cDNA insert were digested with *EcoRI* and *HindIII* to confirm the presence of the  
168 IFN $\epsilon$  cDNA insert.

## 169 **Expression of camel IFN $\epsilon$ cDNA in *E. coli* BL21(DE3) pLysS**



170 The transformed *E. coli* BL21(DE3) pLysS harbouring the recombinant plasmid were cultured in 1  
171 L of Luria broth medium supplemented with 34 µg/mL kanamycin and incubated at 37 °C for 4 h at  
172 250 rpm. When the optical density at 600 nm reached 0.6, isopropyl-β-D-1-thiogalactopyranoside  
173 (IPTG) was added to the culture at a concentration of 1 mM. The culture flask was incubated at 37  
174 °C with shaking at 250 rpm for 5 h, after which the bacterial cells were harvested by centrifugation  
175 at 8000 rpm for 20 min at 4 °C. The bacterial pellets were re-suspended in 10 mL of 0.1 M  
176 potassium phosphate buffer, pH 7.5, containing 50% glycerol. The bacterial cell suspension was  
177 then sonicated on an ice-bath using 4x 30-s pulses, and the cell debris were removed by  
178 centrifugation at 10,000 rpm for 10 min at 4 °C, after which the supernatant and pellets were  
179 collected in separate eppendorf tubes. The pellets were re-suspended in 5 mL of 0.1 M potassium  
180 phosphate buffer, pH 7.5, containing 50% glycerol and both supernatant and pellets were used for  
181 further analysis. The gene expression was also analyzed using lactose as an inducer at a  
182 concentration of 2 g/L in the fermentation medium.

### 183 **Protein determination**

184 Protein concentration was determined according to Bradford (1976) [33], using 0.5 mg/mL of  
185 bovine serum albumin (BSA) as a standard.

### 186 **Sodium dodecyl sulfate gel electrophoresis (SDS-PAGE)**

187 The expression of the camel recombinant *IFNε* gene in *E. coli* was checked by performed a 12%  
188 SDS-PAGE according to Laemmli, 1970 [34]. After electrophoresis, the gel was stained with  
189 Coomassie Brilliant Blue R-250 followed by de-staining in a solution of 10% (v/v) methanol and  
190 10% (v/v) acetic acid.

## 191 **Refolding of *C. dromedarius* recombinant IFN $\epsilon$ protein inclusion** 192 **bodies**

193 The transformed *E. coli* BL21(DE3) pLysS cells containing over-expressed camel IFN $\epsilon$  protein was  
194 disrupted by sonication, and the inclusion bodies were recovered by centrifugation at 10,000 rpm  
195 for 30 min at 4 °C. The pellets were washed three times with 20 mM Tris-HCl, pH 8.0, and after the  
196 final wash, the pellets were resuspended in denaturation buffer containing 50 mM M Tris-HCl (pH  
197 8.0), 0.3 M NaCl, and 2% SDS with continuous stirring on an ice-bath until the solution becomes  
198 clear. The protein solution was then kept at 4 °C overnight, followed by centrifugation for 10 min at  
199 10,000 rpm and 4 °C to precipitate the excess SDS. Subsequently, KCl was added to the supernatant  
200 at a final concentration of 400 mM, and the solution was kept at 4 °C overnight. Thereafter,  
201 centrifugation was carried out for 10 min at 10,000 rpm and 4 °C, and the clear solution was  
202 dialyzed overnight against 50 mM potassium phosphate buffer (pH 7.5) and applied to a nickel  
203 affinity column [35, 36].

## 204 **Affinity purification of *C. dromedarius* recombinant IFN $\epsilon$**

205 The recombinant IFN $\epsilon$  protein was purified using a single-step High-Select High Flow (HF) nickel  
206 affinity chromatographic gel (Sigma-Aldrich, Cat. # H0537). The nickel affinity column (1.0 cm ×  
207 1.0 cm) was packed with the affinity matrix and washed thoroughly with 30 mL of de-ionized  
208 water, followed by equilibration with the 5-bed volumes of 50 mM potassium phosphate buffer (pH  
209 7.5) containing 20 mM imidazole. A solution of solubilized inclusion bodies (5 mL) was loaded  
210 onto the column, and the column was washed with 5-bed volumes of 50 mM potassium phosphate  
211 buffer (pH 7.5) containing 20 mM imidazole. The recombinant IFN $\epsilon$  protein was eluted with 50

212 mM potassium phosphate buffer (pH 7.5) containing 500 mM imidazole. The collected fractions  
213 were measured at 280 nm, and the fractions presented in the second peak were pooled together and  
214 dialyzed overnight against 50 mM potassium phosphate buffer (pH 7.5). The purity of the dialyzed  
215 recombinant IFN $\epsilon$  protein was checked by performing 12% SDS-PAGE.

## 216 **Electron microscopy analysis**

217 The recombinant *C. dromedarius* IFN $\epsilon$  inclusion bodies were fixed in a solution of formaldehyde  
218 and glutaraldehyde (4:1) and observed and analyzed by transmission electron microscopy (TEM;  
219 JEOL-JSM 1400 plus) and scanning electron microscopy (SEM; JEOL-JSM 5300).

## 220 **Cytotoxicity of *C. dromedarius* recombinant IFN epsilon on breast** 221 **cancer cell lines**

222 Human breast cancer cell lines, MDA-MB-231 and MCF-7, were obtained from the lab of Professor  
223 Stig Linder, Karolinska Institute, Sweden. Cells were cultured in Dulbecco's Modified Eagle's  
224 Medium supplemented with 10% Fetal Bovine Serum (Sigma), 100 U/mL penicillin, and 100  
225 mg/mL streptomycin. Cells were maintained in 5% CO<sub>2</sub> at 37 °C.

## 226 **MTT assay**

227 MDA-MB-231 and MCF-7 cells were seeded in 96 well plates (15,000 and 10,000 cells/ well,  
228 respectively). After 24 h, cells were treated with different concentrations of recombinant interferon  
229 epsilon and the control cells received untreated medium in the same buffer. Cells were washed  
230 twice with PBS after 48 h of incubation, and 3-(4,5-Dimethyl-2-thiazolyl)-2,5-diphenyl-2H-  
231 tetrazolium bromide (MTT) reagent (10  $\mu$ L of 5 mg/mL) (Serva) in 100  $\mu$ L serum free medium was  
232 added to each well. After 3-4 h of incubation at 37 °C, the medium was discarded, and cells were

233 incubated with 100  $\mu$ L of DMSO. Plates were shaken, then absorbance was measured at 490 nm  
234 [37].

## 235 **Apoptosis assay**

236 Apoptosis was analyzed using Annexin V-FITC apoptosis detection kit (Miltenyi Biotec). MDA-  
237 MB-231 and MCF-7 were incubated with recombinant IFN $\epsilon$  for 48 h. The floating cells were  
238 detached from the plate surface and attaching cells were harvested by trypsinization and pelleted by  
239 centrifugation. The cell pellets were resuspended in binding buffer and incubated with fluorescein  
240 isothiocyanate (FITC)-labeled Annexin V for 15 min in the dark at room temperature. Cells were  
241 washed and resuspended in binding buffer, then and Propidium Iodide was added. The stained cells  
242 were analyzed in Flow Cytometry Service core at Center of Excellence for Research in  
243 Regenerative Medicine and its Applications using BD FACSCalibur flow cytometer (BD  
244 Biosciences).

## 245 **Caspase-3 assay**

246 Caspase-3 expression level was detected in MDA-MB-231 untreated and camel recombinant IFN $\epsilon$   
247 treated cell line using Human Caspase-3 (Casp-3) sandwich ELISA Kit (SinoGeneClon Biotech  
248 Co., Ltd) according to manufacturer's instructions.

## 249 **Results and Discussion**

### 250 ***C. dromedarius* IFN $\epsilon$ full-length cDNA isolation and sequence analysis**

251 By far, most information about type I IFNs has stemmed from the studies of IFNs from other  
252 species such as human, turkey, zebra fish, and bovine, but no published data is available on the  
253 Arabian camel IFNs [13, 22, 23]. In the present study, the full-length IFN $\epsilon$  cDNA of the Arabian

254 camel, *C. dromedarius*, was isolated by RT-PCR using gene-specific primers designed from the  
255 available expressed sequence tag (EST) camel genome project database (<http://camel.kacst.edu.sa/>).  
256 The PCR product corresponding to the 582 nucleotides represents the full-length IFN $\epsilon$  cDNA (Fig  
257 1). The PCR product was cloned into the pGEM-T-Easy vector, and the cDNA insert was  
258 sequenced using the T7 and SP6 primers. The nucleotide sequence was deposited in the GenBank  
259 database under the accession number MHO25455. Comparing the nucleotide sequence of the  
260 Arabian camel IFN $\epsilon$  cDNA with the nucleotide sequences of other species deposited in the  
261 GenBank database using the Blastn and Blastp programs available on the National Center for  
262 Biotechnology Information (NCBI) server revealed that the putative camel IFN $\epsilon$  gene has high  
263 statistically significant similarity scores to numerous IFN $\epsilon$  genes from other species (Table 1). To  
264 determine the relatedness of *C. dromedarius* IFN $\epsilon$  with known amino acid sequences available in  
265 the GenBank database, a multiple sequence alignment was conducted (Fig 2). It was observed that  
266 the percentage identity was 100% for *Camelus ferus* (GenBank accession no. XP\_006179655), 95%  
267 for *Vicugna pacos* (GenBank accession no. XP\_006215195), 82% for *Sus scrofa* (GenBank  
268 accession no. NP\_001098780), 78% for *Bos taurus* (GenBank accession no. XP\_005209958), and  
269 75% for *Homo sapiens* (GenBank accession no. NP\_795372). Moreover, the camel IFN $\epsilon$  has high  
270 amino acid sequence homology with other type I IFNs, of which the closest paralog is IFN $\beta$ , and  
271 they share 38% identical residues [12]. A phylogenetic tree constructed (Fig 3) from the amino acid  
272 sequences of the predicted IFN $\epsilon$  proteins deposited in the GenBank indicated that the Arabian  
273 camel IFN $\epsilon$  took a separate evolutionary line distinct from other ungulates and mammalian species,  
274 including *H. sapiens*.

275

276 **Table 1.** Homology of the deduced amino acids of *C. dromedarius* interferon  
277 epsilon with other species.

278

279

280

281

282

283

284

| <b>Animal species</b>             | <b>Accession no.</b> | <b>% Identity</b> |
|-----------------------------------|----------------------|-------------------|
| <i>Camelus ferus</i>              | XP_006179655         | 100               |
| <i>Vicugna pacos</i>              | XP_006215195         | 95                |
| <i>Balaenoptera acutorostrata</i> | XP_007176883         | 82                |
| <i>Sus scrofa</i>                 | NP_001098780         | 82                |
| <i>Hipposideros armiger</i>       | XP_019484975         | 81                |
| <i>Orcinus orca</i>               | XP_004275093         | 80                |
| <i>Delphinapterus leucas</i>      | XP_022407268         | 80                |
| <i>Lipotes vexillifer</i>         | XP_007455001         | 80                |
| <i>Tursiops truncatus</i>         | XP_019790467         | 79                |
| <i>Bos mutus</i>                  | XP_005887920         | 79                |
| <i>Bos taurus</i>                 | XP_005209958         | 78                |
| <i>Bison bison bison</i>          | XP_010851614         | 78                |
| <i>Ovis aries</i>                 | XP_011982517         | 78                |
| <i>Macaca nemestrina</i>          | XP_011768789         | 77                |
| <i>Papio anubis</i>               | XP_021783163         | 77                |
| <i>Homo sapiens</i>               | NP_795372            | 75                |

285

## 286 ***C. dromedarius* IFN $\epsilon$ structure annotations and predicted 3D structure**

287 The Arabian camel IFN $\epsilon$  primary structure and the protein motif secondary structure annotation  
288 prediction are shown in Figs 4 and 5. The nucleotides and the deduced amino acid sequence showed  
289 an open reading frame consisting of 582 nucleotides and 193 amino acid residues with a calculated  
290 molecular weight of 22.953 kDa. The isoelectric point, predicted using a computer algorithm, was  
291 found to be 9.03. From the primary structure and the multiple sequence alignment of camel IFN $\epsilon$   
292 with other ungulates and human, several observations merit discussion. First, the primary structure  
293 homology was greater than 75% among type I IFNs of different species. The high degree of amino  
294 acid sequence identity and conservation is presumably due to the functional constraints during

295 evolution, although it was clear from the phylogenetic tree analysis (Fig 3) that the camel IFN $\epsilon$  took  
296 a separate evolutionary line away from other species having type I IFNs. Second, the putative  
297 Arabian camel IFN $\epsilon$  protein is characterized by the presence of amino acid residues Ser<sup>38</sup>, Glu<sup>112</sup>,  
298 and Ile<sup>167</sup> that are highly conserved among type I IFN $\epsilon$ . Third, the Arabian camel IFN $\epsilon$  putative  
299 protein contained three cysteine residues (Cys<sup>53</sup>, Cys<sup>163</sup>, and Cys<sup>175</sup>), like those found in the bovine  
300 IFN $\epsilon$ , and two of them, probably Cys<sup>53</sup> and Cys<sup>175</sup>, might be involved in the formation of  
301 intramolecular disulfide bonds that link the N-terminus to the end of helix F. These cysteine  
302 residues are highly conserved amongst other members of the examined type-I IFN homologs, such  
303 as human IFN $\lambda$  and  $\beta$  and rabbit interferon- $\gamma$  [38-40]. Fourth, the analysis of putative glycation sites  
304 in the camel IFN $\epsilon$  protein (Figs 3 and 4) led to the prediction of seven potential glycation sites,  
305 although not occurring within the conserved signal for glycosylation, Asn-Xaa-Ser/Thr; these sites  
306 are 3NKPF, 35NRES, 43NKLR, 59NFLL, 90NLFR, 139NLRL, and 173NRCL. These glycation  
307 sites might act as the sites of protection against proteases-mediated hydrolysis and contributing to  
308 the process of folding, oligomerization, and stability of the protein. The identification of such sites  
309 raised the possibility that the putative camel IFN $\epsilon$  might form a glycoprotein [41]. Fifth, the  
310 Arabian camel IFN $\epsilon$  amino acid sequence was characterized by the presence of IFNAR-1- and  
311 IFNAR-2-binding domains. The putative IFNAR-1-binding domain is critical for receptor  
312 recognition and biological activity, and this domain was represented by the amino acid residues, F<sup>29</sup>,  
313 Q<sup>30</sup>, R<sup>33</sup>, R<sup>36</sup>, E<sup>37</sup>, K<sup>40</sup>, N<sup>43</sup>, and K<sup>44</sup>, located in the first  $\alpha$ -helix of the camel IFN $\epsilon$  protein (Fig 5).  
314 The IFNAR-2-binding site contained the amino acid residues, L<sup>54</sup>, P<sup>55</sup>, H<sup>56</sup>, R<sup>57</sup>, K<sup>58</sup>, N<sup>59</sup>, F<sup>60</sup>, L<sup>61</sup>,  
315 P<sup>63</sup>, Q<sup>64</sup>, K<sup>65</sup>, Q<sup>71</sup>, and Y<sup>72</sup>. Other conserved amino acids residues involved in the binding of  
316 different ligands and DNA are shown in Table 2.

317 The predicted 3D structure of the Arabian camel IFN $\epsilon$  indicated that the protein secondary structure  
 318 consisted of six  $\alpha$ -helices labelled from A to F. The composition of the predicted secondary  
 319 structure revealed 61.5%  $\alpha$ -helices, 32.6% coils, and 2.1% turns. Compared with other type I $\alpha$   
 320 IFNs, the camel protein showed an extended C-terminus (Fig 6 A, B, and C). It was observed that  
 321 the overall folding in the 3D structure of camel IFN $\epsilon$  was quite similar to that of the bovine-type  
 322 IFN $\epsilon$  [10]. Moreover, the alignment template model (Fig 7 A and B) showed 36.36% similarity  
 323 between the camel IFN $\epsilon$  and *H. sapiens* type-I  $\alpha$ 2 IFN, with the preservation of the components of  
 324 the secondary structures,  $\alpha$ -helices, coils, and turns.

325

326 **Table 2.** Conserved amino acid residues of *C. dromedarius* interferon  $\epsilon$  involved in different ligands  
 327 and metal ions binding.

| Annotation features                                           | Amino acid residues                                                                                                                                                                                                                                                                                                                          |
|---------------------------------------------------------------|----------------------------------------------------------------------------------------------------------------------------------------------------------------------------------------------------------------------------------------------------------------------------------------------------------------------------------------------|
| Contact(s) to ligands<br>- N-Acetyl-2-Deoxy-2-Amino-Galactose | Arg <sup>131</sup> , Ser <sup>132</sup>                                                                                                                                                                                                                                                                                                      |
| Sulfate ion (SO <sub>4</sub> )                                | Arg <sup>36</sup> , Glu <sup>37</sup> , Lys <sup>40</sup> , Lys <sup>44</sup> , Lys <sup>188</sup>                                                                                                                                                                                                                                           |
| - Beta-D-Glucose, 6-Deoxy-Alpha-D-Glucose                     | Lys <sup>44</sup> , Glu <sup>102</sup> , Ile <sup>104</sup> , Gln <sup>105</sup> , Arg <sup>108</sup>                                                                                                                                                                                                                                        |
| - 1,2-Ethandiol                                               | Asn <sup>35</sup> , Asn <sup>43</sup> , Arg <sup>46</sup> , Leu <sup>85</sup> , Gln <sup>116</sup> , Leu <sup>176</sup>                                                                                                                                                                                                                      |
| - 4-(2-Hydroxyethyl)-1-Piperazine                             | Arg <sup>46</sup> , Ser <sup>49</sup>                                                                                                                                                                                                                                                                                                        |
| Contact(s) to metals<br>-Zinc ion                             | Gln <sup>143</sup>                                                                                                                                                                                                                                                                                                                           |
| Contact(s) to nucleic acids                                   | Gln <sup>30</sup> , Arg <sup>33</sup> , Val <sup>34</sup> , Arg <sup>36</sup> , Glu <sup>37</sup> , Leu <sup>39</sup> , Lys <sup>40</sup> ,<br>Asp <sup>107</sup> , Ser <sup>111</sup> , Glu <sup>112</sup> , Gln <sup>115</sup> , Glu <sup>118</sup> , Tyr <sup>119</sup> ,<br>Phe <sup>177</sup> , Gln <sup>181</sup> , Gly <sup>184</sup> |

328

## 329 **Expression, solubilization, and refolding of camel IFN $\epsilon$ protein**

330 The Arabian camel IFN $\epsilon$  cDNA was expressed in *E. coli* BL21(DE3) pLysS as a 6-histidine fusion  
 331 protein under the control of the T7 promoter of the pET28a (+) vector. The recombinant protein was



332 found to be overexpressed when *E. coli* cells were induced with either 1.0 mM IPTG or 2.0 g/L  
333 lactose in the fermentation medium (Fig 8 A and B). Surprisingly, the recombinant protein was  
334 found as insoluble inclusion bodies that were precipitated in the form of submicron spherical  
335 proteinaceous particles upon cell disruption by sonication and after centrifugation at 12,000 rpm for  
336 10 min at 4 °C, leaving behind a supernatant devoid of the recombinant IFN $\epsilon$  protein (Fig 8B). The  
337 transmission electron micrograph (Fig 9A) showed that the *E. coli* cells becomes to form dark,  
338 dense spot areas in the cytoplasm when induced to express the recombinant IFN $\epsilon$  protein either by  
339 IPTG or lactose. The recombinant camel IFN $\epsilon$  inclusion bodies appeared as homogeneous spherical  
340 particles of the diameter ranging from 0.5 to 1.0  $\mu$ m under SEM (Fig 9 B and C). It is well  
341 documented that the expression of a foreign gene in the *E. coli* cells results in the accumulation of  
342 recombinant proteins in the form of inactive, insoluble aggregates of inclusion bodies. Thus, the  
343 biggest challenge remaining is the recovery of soluble and functional active recombinant protein  
344 from inclusion bodies; this requires standardization protocols for solubilization, re-folding, and  
345 subsequent purification [41]. Interestingly, the camel IFN $\epsilon$  inclusion bodies are localized  
346 preferentially in the polar region of the *E. coli* cells, as well as in the mid-cell region. This polar  
347 distribution is mainly attributed to macromolecular crowding in the nucleoid region that is rich in  
348 nucleic acids and other macromolecules, which might prevent the accumulation of large protein  
349 aggregates [41]. In most cases, urea at a high concentration (4-8 M) or guanidine hydrochloride was  
350 used to solubilize and refold inclusion bodies. Our attempt to solubilize and refold the camel IFN $\epsilon$   
351 inclusion bodies was failed (data not shown). Thus, the alternative solubilization and refolding  
352 protocol was applied based on a strong anionic detergent SDS, which can be easily removed by  
353 precipitation with KCl. The recombinant camel IFN $\epsilon$  inclusion bodies were collected, solubilized  
354 and refolded by the SDS/KCl method (Fig 10A, Lane 3). The solubilized and refolded inclusion

355 bodies were subjected to nickel-affinity chromatography. The recombinant camel IFN $\epsilon$  was bound  
356 to the affinity matrix and eluted using imidazole at a concentration of 500 mM (Fig 10 B, Peak 2).  
357 The purified protein showed a specific, unique protein band at 22.953 kDa as shown in Fig 10 C  
358 and D.

### 359 ***C. dromedarius* IFN $\epsilon$ inhibits survival of breast cancer cells**

360 A growing body of evidence demonstrates the antitumor effect of type I interferons [42] however,  
361 the effects of recombinant IFN $\epsilon$  on human cancer cells have not been fully elucidated. In order to  
362 study the effects of the Arabian camel IFN $\epsilon$  on human cancer cells, MDA-MB-231 and MCF-7  
363 breast cancer cells were treated with different concentrations of recombinant IFN $\epsilon$  protein. After 48  
364 h of treatment, morphological changes were observed starting from 2.6  $\mu$ M of the recombinant  
365 protein. Cells rounded up and were more easily detached. The cells exhibited shrinkage and  
366 reduction in size compared to the control cells, suggesting inhibition of cell viability (Fig 11). To  
367 investigate the effect of recombinant IFN $\epsilon$  on cell viability, MTT assays were performed. Results  
368 demonstrate that IFN $\epsilon$  inhibits the viability of both cell lines in a dose dependent manner. IC<sub>50</sub> was  
369 calculated revealing concentrations of 5.65 $\pm$ 0.2 $\mu$ M and 3.91 $\pm$ 0.6  $\mu$ M for MDA-MB-231 and MCF-  
370 7 cells, respectively (Fig 12). Evasion of regulated modes of cell death has been well established as  
371 a hallmark of cancer [43]. To understand the mechanism underlying IFN $\epsilon$ -induced inhibition of  
372 cancer cell survival, MDA-MB-231 and MCF-7 cells were incubated with IFN $\epsilon$ , and apoptosis  
373 assays were performed. Results reveal that, IFN $\epsilon$  induces early and late apoptosis in both cell lines  
374 (Fig 13). Taken together interferon epsilon induces morphological changes and inhibits the survival  
375 of cancer cells in a dose dependent manner via the induction of apoptosis. Cancer is considered an  
376 aberrant tissue/organ comprising a hierarchical composition of heterogeneous cell populations. The

377 tumor microenvironment and related cytokines, such as interferons, play a crucial role during tumor  
378 development and regulation of cancer cell survival and tumor progression [42]. Type I IFNs, such  
379 as IFN $\epsilon$ , signal through interferon  $\alpha/\beta$  receptor (IFNAR) which is composed of two subunits,  
380 INFAR1 and IFNAR2. Studies have reported that mice with an impaired Type 1 interferon  
381 signaling (*Ifnar1*<sup>-/-</sup>) are more tumor-prone compared with wild type mice when exposed to the  
382 carcinogen methylcholanthrene [44] and mice lacking functional Type I IFN signaling have shown  
383 enhanced susceptibility of for *v-Abl*-induced leukemia/lymphoma [45]. IFNAR1-deficient tumors  
384 are rejected when transplanted into wild type mice, however, tumors grow when transplanted  
385 in *Ifnar1*<sup>-/-</sup> mice, demonstrating the role of type I IFNs in carcinogenesis and tumor progression  
386 [44]. IFN- $\alpha/\beta$  has direct effects in tumor cells, inducing growth arrest and apoptosis via activating  
387 the JAK-STAT pathway and the expression of genes whose promoters contain the IFN-stimulated  
388 response element, such as the apoptosis mediators FAS and TRAIL [46, 42]. The effects of type I  
389 IFNs on cancer cells vary depending on the type of tumor, and not all tumor cells are susceptible to  
390 the apoptotic effects of IFNs. Similar to orthologs in other species, recombinant canine IFN $\epsilon$  has  
391 shown to be capable of activating the JAK-STAT pathway and inhibiting the proliferation of canine  
392 cell lines [47]. To complement what has been investigated in the study, the expression level of  
393 Caspase-3 was determined to evaluate the cytotoxicity strength and the effectiveness of the potential  
394 camel IFN $\epsilon$  protein. Caspase-3 expression has been directly correlated with apoptosis because of its  
395 location in the protease cascade pathway as it is activated by diverse death-inducing signal such as  
396 chemotherapeutic agents [48, 49]. Our results showed that caspase-3 expression level was increased  
397 in MDA treated cells and the fold of induction was found to be 168.03% and 157.8 % at a protein  
398 concentration of 3 and 6  $\mu$ M, respectively compared to untreated control cells (Fig 14). This finding  
399 has important clinical implication and in conjunction with other studies suggest that IFN $\epsilon$  can be

400 considered as a chemotherapeutic agent that may help in improving the response of adjuvant  
401 therapy for breast cancer.

402 In conclusion, we present here cloning, expression, refolding, and characterization of a novel gene  
403 encoding the Arabian camel IFN $\epsilon$ . Moreover, this study does underpin the Arabian camel  
404 recombinant IFN $\epsilon$  as a possible novel and effective agent for the treatment of cancer.

405

406

407

408

## 409 **References**

- 410 1. Isaacs A, Lindenmann J, Andrewes CH. Virus interference. I. The interferon. Proc Royal  
411 Soc B Biol Sci. 1957; 147(927): 258-267.
- 412 2. Pestka S. The Interferons: 50 Years after Their Discovery, There Is Much More to Learn. J  
413 Biol Chem. 2007; 282(28): 20047-20051.
- 414 3. Baldo BA. Side effects of cytokines approved for therapy. Drug Saf. 2014; 37: 921–943.
- 415 4. Borish LC, Steinke JW. Cytokines and chemokines. J Allergy Clin Immunol. 2003; 111:  
416 S460–S475.
- 417 5. Vacchelli E, Eggermont A, Fridman WH, Galon J, Zitvogel L, Kroemer G, et.al. Trial  
418 Watch Immunostimulatory cytokines. Oncoimmunology. 2013; 2(7): E24850.  
419 [doi.org/10.4161/onci.24850](https://doi.org/10.4161/onci.24850).
- 420 6. Peng FW, Duan ZJ, Zheng LS, Xie ZP, Gao HC, Zhang H, et al. Purification of recombinant  
421 human interferon-epsilon and oligonucleotide microarray analysis of interferon-epsilon-  
422 regulated genes. Protein Expr Purif. 2007; 53: 356-362.
- 423 7. Tayal V, Kalra BS. Cytokines and anti-cytokines as therapeutics--an update. Trial Watch:  
424 Immunostimulatory cytokines. Eur J Pharmacol. 2008; 579: 1-12.
- 425 8. Vacchelli E, Galluzzi L, Eggermont A, Galon J, Tartour E, Zitvogel L, et.al. Trial Watch:  
426 Immunostimulatory cytokines. Oncoimmunology. 2012; 1:493-506.

- 427 9. Fisher CD, Wachoski-Dark GL, Grant DM, Bramer SA, Klein C. Interferon epsilon is  
428 constitutively expressed in equine endometrium and up-regulated during the luteal phase.  
429 Anim Reprod Sci. 2018; 195:38-43. doi.org/10.1016/j.anireprosci.2018.05.003.
- 430 10. Guo Y, Gao M, Bao J, Luo X, Liu Y, An D, et al. Molecular cloning and characterization of  
431 a novel bovine IFN-ε . Gene. 2015; 558 (1): 25-30.
- 432 11. Krause CD, Pestka S. Evolution of the Class 2 cytokines and receptors, and discovery  
433 of new friends and relatives. Pharmacol Ther. 2005; 106: 299-346.
- 434 12. Hardy HP, Owczarek CM, Jermiin LS, Ejdebäck M, Hertzog PJ. Characterization of the  
435 type I interferon locus and identification of novel gene. Genomics.2004; 84(2):331-345.
- 436 13. Kontsek P, Karayianni-Vasconcelos G, Kontsekove E. The human interferon system:  
437 characterization and classification after discovery of novel member S47. Acta Virol. 2003;  
438 201-215.
- 439 14. Green DS, Nunes AT, Annunziata CM, Zoon KC. Monocyte and interferon based therapy  
440 for the treatment of ovarian cancer. Cytok Growth Factor Rev. 2016; 29: 109-115.
- 441 15. Cooksley WG. The role of interferon therapy in hepatitis B. Med Gen Med . 2004; 6 (1):16.
- 442 16. Noël N, Béatrice BJ, Huot N, Goujard C, Lambotte O, Müller-Trutwin M. Interferon-  
443 associated therapies toward HIV control; The black and forth. Cytok Growth Factor Rev.  
444 2018; 40: 99-112.
- 445 17. Shepherd J, Waugh N, Hewitson P. Combination therapy (interferon alfa and ribavirin) in  
446 the treatment of chronic hepatitis C: a rapid and systematic review. Health Technol Assess.  
447 2000; 4(33):1-67.

- 448 18. Day SL, Ramshaw IA, Ramsay AJ, Ranasinghe C. Differential effects of the type I  
449 interferons alpha4, beta, and epsilon on antiviral activity and vaccine efficacy. J Immunol.  
450 2008; 180: 7158-7166.
- 451 19. Demers A, Kang G, Ma F, Lu W, Yuan Z, Li Y, et al. The mucosal expression pattern of  
452 interferon- $\epsilon$  in rhesus macaques. J Leukoc Biol.2014; 96: 1101-1107.
- 453 20. Fung KY, Mangan NE, Cumming H, Horvat JC, Mayall JR, Stifter SA, et al. Interferon-  
454 epsilon protects the female reproductive tract from viral and bacterial infection. Science.2013;  
455 339: 1088-1092.
- 456 21. Hermant P, Francius C, Clotman F, Michiels T. IFN- $\epsilon$  Is Constitutively Expressed by Cells  
457 of the Reproductive Tract and Is Inefficiently Secreted by Fibroblasts and Cell Lines.  
458 PloSOne. 2013; 8(8): e71320. doi: 10.1371/journal.pone.0071320.
- 459 22. Altmann SM, Mellon MT, Distel DL, Kin CH. Molecular and functional analysis of an  
460 interferon gene from the zebrafish, *Danio rerio*. J Virol. 2003;77:1992-2002.
- 461 23. Li H, Ma B, Jin H, Wang J. Cloning, *in vitro* expression and bioactivity of goose interferon-  
462  $\alpha$ . Cytok. 2006; 34 (3-4): 177-183.
- 463 24. Robertsen B, Bergan V, Rokenes T, Larsen R, Albuquerque A. Atlantic Salmon Interferon  
464 Genes: Cloning, Sequence Analysis, Expression, and Biological Activity. J Interf Cytok Res.  
465 2003; 23: 601-612.
- 466 25. Suresh M, Karaca K, Foster D, Sharma JM. Molecular and Functional Characterization of  
467 Turkey Interferon. J Virol. 1995; 69: 8159-8163.

- 468 26. Al-Swailem AM, Shehara MM, Adu-Duhier FM, Al-Yamani EJ, Al-Busadah KA, Al-  
469 Arawi MS, et al. Sequencing, Analysis, and Annotation of Expressed Sequence Tags for  
470 *Camelus dromedaries*. PLoSOne. 2010; 5(5):e10720. doi.org/10.1371/journal.pone.0010720.
- 471 27. Ataya FS, Al-Jafari AA, Daoud MS, Al-Hazzani AA, Shehata A, Saeed HM, et al.  
472 Genomics, phylogeny and *in silico* analysis of mitochondrial glutathione Stransferase-kappa  
473 from the camel *Camelus dromedaries*. Res Vet Sci. 2014; 97(1): 46-54.
- 474 28. Sambrook J, Frisch E, Maniatis T. Molecular Cloning: A Laboratory Manual, 2<sup>nd</sup> ed.  
475 Cold Spring Harbor Laboratory Press, New York; 1989.
- 476 29. Sanger F, Nicklen S, Coulson AR. DNA sequencing with chain-terminating inhibitors.  
477 Proc Natl Acad Sci. USA. 1977;74 (12): 5463–5467.
- 478 30. Dereeper A, Guignon V, Blanc G, Audic S, Buffet S, Chevenet F, et al. Phylogeny.fr:  
479 robust phylogenetic analysis for the non-specialist. J Nucleic Acids Res. 2008; 36: W465–  
480 W469.
- 481 31. Ortiz AR, Strauss CE, Olmea O. MAMMOTH (Matching molecular models obtained from  
482 theory): An automated method for model comparison. Protein Sci. 2002; 11: 2606–2621.
- 483 32. Roy A, Kucukural A, Zhang Y. I-TASSER: a unified platform for automated protein  
484 structure and function prediction. Nat Protoc. 2010; 5(4):725–738.
- 485 33. Bradford MM. A rapid and sensitive method for the quantitation of microgram quantities of  
486 protein utilizing the principle of protein-dye binding. Anal Biochem. 1976;72 (1):248–254.
- 487 34. Laemmli UK. Cleavage of Structural Proteins during the Assembly of the Head of  
488 Bacteriophage T4. Nature. 1970; 227: 680-685.



- 489 35. He C, Ohnishi K. Efficient renaturation of inclusion body proteins denatured by SDS.  
490 Biochem Biophys Res Commun. 2017; 490(4):1250-1253.
- 491 36. Bornhorst JA, Falke JJ. [16] Purification of Proteins Using Polyhistidine Affinity Tags.  
492 Methods Enzymol. 2000 ; 326:245–254.
- 493 37. van de Loosdrech AA, Nennie E, Ossenkoppele GP, Beelen RHJ, Langenhuijsen MAC.  
494 Cell mediated cytotoxicity against U 937 cells by human monocytes and macrophages in a  
495 modified colorimetric MTT assay: A methodological study. J Immunol Met. 1991; 141(1):  
496 15-22.
- 497 38. Gad HH, Hamming OH, Hartmann R. The structure of human interferon lambda and what it  
498 has taught us. J Interf Cytok Res. 2010; 30: 565-571.
- 499 39. Karpussas M, Nolte M, Benton CB, Meier W, Lipscomb WN, Goelz S. The crystal  
500 structure of human interferon beta at 2.2-Å resolution. Proc Natl Acad Sci USA. 1997; 94:  
501 11813-11818.
- 502 40. Samudzi CT, Burton LE, Rubin JR. Crystal structure of recombinant rabbit interferon-  
503 gamma at 2.7-Å resolution. J Biol Chem. 1991; 266: 21791-21797.
- 504 41. Vallejo LF, Rinas U. Strategies for the recovery of active proteins through refolding of  
505 bacterial inclusion body proteins. Microb Cell Fact. 2004; 3: 11. doi.org/10.1186/1475-2859-  
506 3-11.
- 507 42. Ruan MFV, Aline H, Medrano MRFV, Hunger A, Mendonca SA, Barbuto JAM, et. al.  
508 Immunomodulatory and antitumor effects of type I interferons and their application in cancer  
509 therapy. Oncotarget. 2017; 8:71249-71284.

- 510 43. Hanahan D, Weinberg RA. Hallmarks of cancer: the next generation. *Cell*. 2011;144: 646-  
511 674.
- 512 44. Dunn GP, Bruce AT, Sheehan KCF, Shankaran V, Uppaluri R, Bui JD, et al. A critical  
513 function for type I interferons in cancer immunoediting. *Nat Immunol*. 2005; 6:722-729.
- 514 45. Herranz S, Través PG, Luque A, Hortelano S. Role of the tumor suppressor ARF in  
515 macrophage polarization. Enhancement of the M2 phenotype in ARF-deficient mice.  
516 *Oncoimmunology*. 2012; 1(8): 1227-1238.
- 517 46. Shen CJ, Chan TF, Chen CC, Hsu YC, Long CY, Lai CS. Human umbilical cord matrix-  
518 derived stem cells expressing interferon- $\beta$  gene inhibit breast cancer cells via  
519 apoptosis. *Oncotarget*. 2016;7: 34172-34179.
- 520 47. Klotz D, Baumgärtner W, Gerhauser I. Type I interferons in the pathogenesis and treatment  
521 of canine diseases. *Vet Immunol Immunopathol*. 2017; 191: 80-93.
- 522 48. Bonfoco E, Krainc D, Ankarcona M, Nicotera P, Lipton SA. Apoptosis and necrosis: two  
523 distinct events induced, respectively, by mild and intense insults with N-methyl-D-aspartate  
524 or nitric oxide/superoxide in cortical cell cultures. *Proc Natl Acad Sci. USA*. 1995;  
525 92(16):7162-7166.
- 526 49. Thornberry NA, Lazebnik Y. Caspases: enemies within. *Science*. 1998; 281:1312-1316.
- 527  
528  
529  
530

531 **Figure legends**

532 **Fig 1.** Agarose gel (1.5%) electrophoresis of PCR product for *C. dromedarius* interferon epsilon  
533 gene (Lane 2). Lane 1 represents 100 base pair DNA ladder.

534 **Fig 2.** Alignment of the deduced amino acid sequence of *C. dromedarius* interferon epsilon with  
535 other species.

536 **Fig 3.** Phylogenetic relationship of *C. dromedarius* interferon epsilon and sequences from other  
537 species. Maximum likelihood tree based on complete coding sequences deposited in GenBank.  
538 Values at nodes are bootstrap  $\geq 50\%$ , obtained from 1000 re-samplings of the data.

539 **Fig 4.** Nucleotide and deduced amino acid encoding region of *C. dromedarius* IFN $\epsilon$ . Important  
540 amino acid residues and regions include: residues contact to N-Acetyl-2-Deoxy- are in box; residues  
541 contact to SO<sub>4</sub> ion are in bold underline; residue contact to Zn<sup>+2</sup> are bold double underline,  
542 conserved amino acid residues in IFN $\epsilon$  protein is in bold dashed underline, residues involved in  
543 IFNAR-1 binding are in circle and residues involved in IFNAR-2 binding are in bold dashed box.  
544 Arrows indicates the location of the forward and reverse primers with restriction enzyme sites are in  
545 bold underline italics.

546 **Fig 5.** Sequence annotations for *C. dromedarius* IFN $\epsilon$  showing the location of  $\alpha$ -helices and  
547 residues contact to ligand and ions. Secondary structure by homology ( Actual ) active sites residues  
548 from PDB site record (); residues contacts to ligand (\*) and to ions (\*).

549 **Fig 6.** Predicted 3D structure of *C. dromedarius* IFN $\epsilon$  protein. (A) The overall secondary structure  
550 in cartoon form, ribbon form (B) and DNA binding form (C). Components of secondary structure  
551 are  $\alpha$ -helices (blue), coils (green) and turns (red). Alpha helices are labelled from A to F.

552 **Fig 7.** (A) Model-template alignment of amino acid residues of *C. dromedarius* IFN $\epsilon$  and *H.*  
553 *sapiens* IFN $\alpha$ 2. Components of the secondary structure are shown in blue ( $\alpha$ -helices) and brown  
554 (coils). Identical amino acid residues are in bold black. (B) Predicted 3D structure model of *C.*  
555 *dromedarius* based on this model template alignment.

556 **Fig 8.** (A) SDS-PAGE (12%) for un-induced *E. coli* DE3 (BL21) pLysS pET28-a (+) harboring *C.*  
557 *dromedarius* IFN $\epsilon$  cDNA (Lanes 2 and 3) and lactose induced culture (Lanes 4-7). (B) SDS-PAGE  
558 (12%) for un-induced *E. coli* DE3 (BL21) pLysS pET28-a (+) harboring *C. dromedarius* IFN $\epsilon$   
559 cDNA (Lane 2), IPTG induced culture supernatant (Lane 3), IPTG induced culture inclusion bodies  
560 (Lane 4), lactose induced culture supernatant (Lane 5) and lactose induced inclusion bodies (Lane  
561 6). Lane 1 represents pre-stained protein molecular weight markers. Induction was carried out for 5  
562 h at 1 mM IPTG and 2 g/L lactose in the fermentation medium. Arrow indicates the location of  
563 inclusion bodies.

564 **Fig 9.** (A) Transmission electron microscope micrograph for normal *E. coli* BL21 (DE3) pLysS  
565 harboring pET28a (+) carrying *C. dromedarius* IFN $\epsilon$  gene becomes to form inclusion bodies, dark  
566 spots when induced to overexpress the recombinant protein. Direct magnification was 10,000 x.  
567 (B), (C) and (D) Scanning electron micrograph for the inclusion body showing a spherical particle  
568 of a diameter ranging from 0.5 to 1.0  $\mu$ m. Direct magnification was 35,000 x for B and C and  
569 50,000 x for D.

570 **Fig 10.** (A) SDS-PAGE of *C. dromedarius* IFN $\epsilon$  inclusion bodies (Lane 2) and solubilized inclusion  
571 bodies (Lane 3). (B) Elution profile of *C. dromedarius* recombinant IFN $\epsilon$  after nickel affinity  
572 chromatography. Column flow rate was adjusted to be 3 mL/5 min. Arrow indicates the fraction at  
573 which buffer was changed to contain imidazole at a concentration of 500 mM as eluent. (C) SDS-

574 PAGE (12%) electrophoresis of nickel affinity purified refolded *C. dromedarius* IFN $\epsilon$ , fraction # 21  
575 (Lane 2). (D) SDS-PAGE (12%) for nickel affinity purified recombinant *C. dromedarius* IFN $\epsilon$   
576 (Lanes 2-4, 5-15  $\mu$ g purified protein was loaded into each well). Lane 1 represents pre-stained  
577 protein molecular weight markers.

578 **Fig 11.** Recombinant Arabian camel IFN $\epsilon$  alters the morphology of breast cancer cell lines MDA-  
579 MB-231 (upper) and MCF-7 (lower).

580 **Fig 12.** Interferon epsilon inhibits the survival of breast cancer cells.

581 **Fig 13.** Interferon epsilon induces apoptosis in breast cancer cells. Cells were treated with 5  $\mu$ M  
582 IFN $\epsilon$  protein for 48 h. Apoptosis assay was performed, and the percentage cell viability was  
583 calculated (\* $p$ <0.5, \*\* $p$ <0.1 and \*\*\* $p$ <0.01).

584 **Fig 14.** Expression of caspase-3 in MDA-MB-231 cell line untreated and recombinant IFN $\epsilon$  treated  
585 cells at a concentration of 3 and 6  $\mu$ M.

586

587

588

589

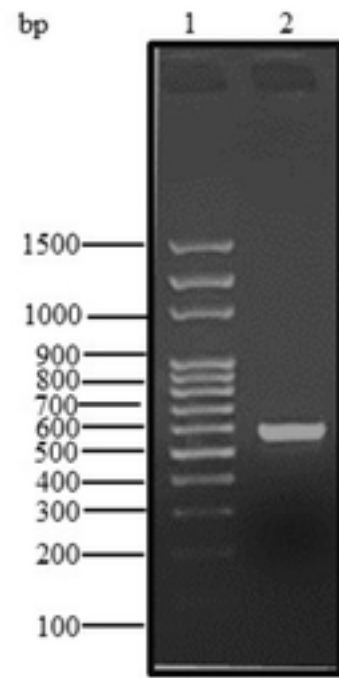



|                                   |   |    |      |                   |            |              |              |               |                   |                 |    |
|-----------------------------------|---|----|------|-------------------|------------|--------------|--------------|---------------|-------------------|-----------------|----|
|                                   |   | 10 | 20   | 30                | 40         | 50           | 60           | 70            |                   |                 |    |
| <i>Camelus dromedarius</i>        | 1 | MI | NKPF | FEIVLVLLAFSTIF    | SRELKPI    | LFQORRVNRE   | SLKLLNKLRTSS | IQOCLPHRKNFLL | PKSMDPHQYOKGHILA  | 80              |    |
| <i>Camelus ferus</i>              | 1 | MI | NKPF | FEIVLVLLAFSTIF    | SRELKPI    | LFQORRVNRE   | SLKLLNKLRTSS | IQOCLPHRKNFLL | PKSMDPHQYOKGHILA  | 80              |    |
| <i>Vicugna pacos</i>              | 1 | MI | NKPF | FEIVLVLLASSTVFS   | SRELKPV    | LFQORRVNRE   | SLKLLNKLRTSS | IQOCLPHRKNFLL | PKSVDPHQYOKGHILA  | 80              |    |
| <i>Balaenoptera acutorostrata</i> | 1 | MI | NKPF | FEIVLVLLASSVCS    | SRELKLV    | LFQORRVNRE   | SLKLLNKLRTSS | IQOCLPHWKNFLL | PKSMNPHQYOKGOALA  | 80              |    |
| <i>Sus scrofa</i>                 | 1 | MI | NKS  | FFEIMLVLLASSTGFS  | SRELKLV    | LFQORRVNRE   | SLKLLNKLRTSS | IQOCLPHRKNFLL | PKSMNPHQYOKGOALA  | 80              |    |
| <i>Bos mutus</i>                  | 1 | MI | NKA  | FFIVLVLLAYSTVCS   | QELKLV     | LFQORRVNRE   | SLKLLNKLRTSS | VQOCLPHRKNFLL | PKSVNPHQYOKGOVLA  | 80              |    |
| <i>Bos taurus</i>                 | 1 | MI | NKA  | FFIVLVLLASSTVCS   | QELKLV     | LFQORRVNRE   | SLKLLNKLRTSS | VQOCLPHRKNFLL | PKSVNPHQYOKGOVLA  | 80              |    |
| <i>Ovis aries</i>                 | 1 | MI | NKA  | FFIVLVLLASSTVCS   | QELKLV     | LFQORRVNRE   | SLKLLNKLRTSS | IQOCLLHRKNFLL | PKSVNPHQYOKGOVLA  | 80              |    |
| <i>Equus caballus</i>             | 1 | MI | NKQ  | FFIMLVLLASSTIF    | SLDLK      | LVLFQORRVNRE | SLKLLNRLQPSA | IQOCLSHRRNFLL | PKSVNPHQYOKRHALA  | 80              |    |
| <i>Macaca mulatta</i>             | 1 | MI | I    | KHFFEIMLVLLASTVFF | LDLKL      | ILFQORRVNRE  | SLKLLNKLRTSS | IHLCLPHRKNFLL | PKSLSPQYOKGHILA   | 80              |    |
| <i>Felis catus</i>                | 1 | MI | NKH  | FFAIVSVLLASSTIF   | PLDLKL     | ALFQORRVNRE  | SLKLLSTLQSSS | IQOCLPHRKNFLL | PKRSVNPRQYOKGOALA | 79              |    |
| <i>Homo sapiens</i>               | 1 | MI | I    | KHFFGT            | VLVLLASTIF | SLDLKL       | ILFQORRVNRE  | SLKLLNKLRTLS  | IQOCLPHRKNFLL     | PKSLSPQYOKGHILA | 80 |

|                                   |    |        |             |          |       |            |              |           |          |          |          |          |      |     |
|-----------------------------------|----|--------|-------------|----------|-------|------------|--------------|-----------|----------|----------|----------|----------|------|-----|
|                                   |    | 90     | 100         | 110      | 120   | 130        | 140          | 150       |          |          |          |          |      |     |
| <i>Camelus dromedarius</i>        | 81 | LHEMLQ | QIFNLFRAVI  | SLDGWEE  | IQMDR | FSELHQQL   | EYLET        | LIRLQAE   | ORSGILG  | SENLR    | LQVKSYF  | QRIHDYLE | SOEY | 160 |
| <i>Camelus ferus</i>              | 81 | LHEMLQ | QIFNLFRAVI  | SLDGWEE  | IQMDR | FSELHQQL   | EYLET        | LIRLQAE   | ORSGILG  | SENLR    | LQVKSYF  | QRIHDYLE | SOEY | 160 |
| <i>Vicugna pacos</i>              | 81 | LHEMLQ | QIFNLFRAVI  | SLHGWEE  | IQMDR | FSELHQQL   | EYLET        | LIQLOAE   | ORSGTLG  | SEHLR    | LQVKSYF  | QRIHDYLE | SOEY | 160 |
| <i>Balaenoptera acutorostrata</i> | 81 | LHEMLQ | QIFNLFRAI   | ISLNGWEE | THMEK | FLELHQQL   | KYLEALMRLQAE | QKRD      | TLGSENLR | LQVKIYF  | QRIHDYLE | NQDY     | 160  |     |
| <i>Sus scrofa</i>                 | 81 | LHEMLQ | QIFSLFRAVI  | SLDGWEE  | SHMEE | FVLVELHQQL | EYLEALMRLQAE | QKSD      | TLGSENLR | LQVKMYF  | QRIHDYLE | NQDY     | 160  |     |
| <i>Bos mutus</i>                  | 81 | LHEMLQ | QIFSLFRAI   | VSLDGWEE | SHTEK | FVLVELHQQL | EYLEALMRLQAE | QKSD      | TLGSENLR | LQVKMYF  | QRIHDYLE | SDQY     | 160  |     |
| <i>Bos taurus</i>                 | 81 | LHEMLQ | QIFSLFRAI   | VSLDGWEE | SHTEK | FVLVELHQQL | EYLEALMRLQAE | QKSD      | TLGSENLR | LQVKMYF  | QRIHDYLE | SDQY     | 160  |     |
| <i>Ovis aries</i>                 | 81 | LHEMLQ | QIFNLFRAI   | SSLDGWEE | SHTEK | FVLVELHQQL | EYLEALMRLQAE | QKSD      | TLGSENLR | LQVKMYF  | QRIHDYLE | SDQY     | 160  |     |
| <i>Equus caballus</i>             | 81 | LHEMLQ | QIFNLFRAI   | PLDAWEE  | SHMET | FLIELHQQL  | EYLEALMGL    | EAEQKCGPL | GSENLR   | LQVKMYFR | RIHDYLE  | NQDY     | 160  |     |
| <i>Macaca mulatta</i>             | 81 | LHEMLQ | QIFSLFRANI  | SLDGWEE  | NHMEK | FLIQLHQQL  | EYLEALMGL    | EAEKLSG   | TLGSDNLR | LQVKMYFR | RIHDYLE  | NQDY     | 160  |     |
| <i>Felis catus</i>                | 80 | LHEMLQ | QIFNLFFRANT | SSDGWEE  | SHVEK | FTELHQQL   | EYLEELTGPE   | AEQDSC    | ILGSENVR | LQIKMYF  | QRIHDYLE | SOEY     | 159  |     |
| <i>Homo sapiens</i>               | 81 | LHEMLQ | QIFSLFRANI  | SLDGWEE  | NHTEK | FLIQLHQQL  | EYLEALMGL    | EAEKLSG   | TLGSDNLR | LQVKMYFR | RIHDYLE  | NQDY     | 160  |     |

|                                   |     |        |            |                        |            |          |     |
|-----------------------------------|-----|--------|------------|------------------------|------------|----------|-----|
|                                   |     | 170    | 180        | 190                    | 200        |          |     |
| <i>Camelus dromedarius</i>        | 161 | SSCAWT | IVQIEINRCL | FFMIQLTGKLSKQGM        | DP         | .....    | 193 |
| <i>Camelus ferus</i>              | 161 | SSCAWT | IVQIEINRCL | FFMIQLTGKLSKQGM        | DP         | .....    | 193 |
| <i>Vicugna pacos</i>              | 161 | SSCAWT | IVQIEINRCL | FFVIQLTGKLSKQGM        | DP         | .....    | 193 |
| <i>Balaenoptera acutorostrata</i> | 161 | STCAWT | IVQVEINRCL | FFVFRLTGKLSKQGM        | ET         | .....    | 193 |
| <i>Sus scrofa</i>                 | 161 | SSCAWT | IVRVEINRCL | FFVFQITGKLSKQGM        | EP         | .....    | 193 |
| <i>Bos mutus</i>                  | 161 | SSCAWT | IVQVEINRCL | FLVFRLTRKLSKQGM        | ET         | .....    | 193 |
| <i>Bos taurus</i>                 | 161 | SSCAWT | IVQVEINRCL | FLVFRLTRKLSKQGM        | ET         | .....    | 193 |
| <i>Ovis aries</i>                 | 161 | SSCAWT | IVKVEINRCL | FLVFRLTRKLSKQGM        | ET         | .....    | 193 |
| <i>Equus caballus</i>             | 161 | SSCART | IVQVEINRCL | FFVFQITGKLSKQGM        | DP         | .....    | 193 |
| <i>Macaca mulatta</i>             | 161 | SSCAWA | IVQVEINRCL | FFVFSLEKLSKQGM         | -          | .....TDP | 193 |
| <i>Felis catus</i>                | 160 | SSCAWT | IVRVEINRCL | FFALQIRKIKRGMHSSKNVEHE | PRADFRS    | I        | 208 |
| <i>Homo sapiens</i>               | 161 | STCAWA | IVQVEISRCL | FFVFSLEKLSKQGRPL       | NDMKQELTTE | FRSPR    | 208 |

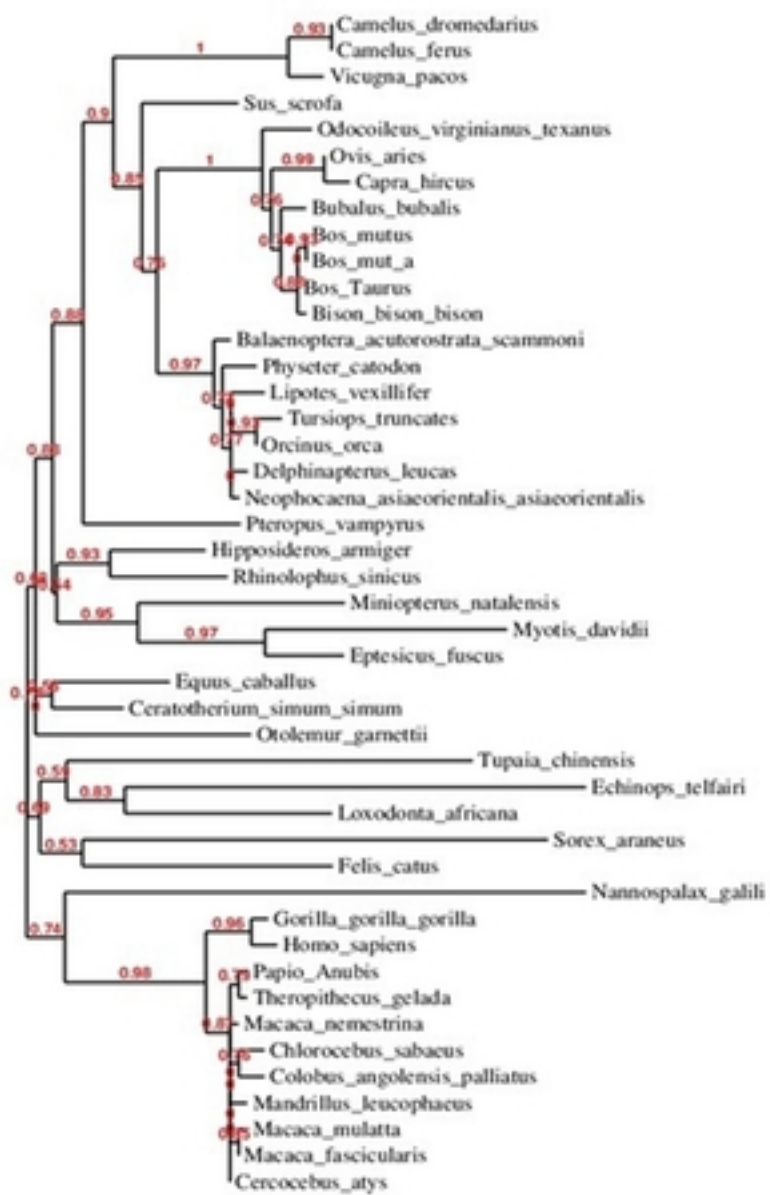

0.2



GAATTC ATGATTAACAAGCCTTTCTT

1     ATG ATT AAC AAG CCT TTC TTT GAA ATT GTG TTG GTG CTG CTG GCT     45  
1     Met Ile Asn Lys Pro Phe Phe Glu Ile Val Leu Val Leu Leu Ala     15  
46     TTT TCC ACC ATC TTC TCC CGA GAG TTG AAA CCG ATT CTT TTC CAA     90  
16     Phe Ser Thr Ile Phe Ser Arg Glu Leu Lys Pro Ile Leu Phe Gln     30  
91     CAA AGA AGA GTA AAC AGA GAG AGT TTA AAA CTC CTG AAT AAA TTG     135  
31     Gln Arg Arg Val Asn Arg Glu Ser Leu Lys Leu Leu Asn Lys Leu     45  
136    CGG ACC TCA TCA ATT CAG CAG TGT CTA CCA CAT AGG AAA AAC TTC     180  
46     Arg Thr Ser Ser Ile Gln Gln Cys Leu Pro His Arg Lys Asn Phe     60  
181    TTG CTT CCC CAG AAG TCT ATG GAT CCT CAC CAG TAT CAG AAA GGA     225  
61     Leu Leu Pro Gln Lys Ser Met Asp Pro His Gln Tyr Gln Lys Gly     75  
226    CAC ATA CTG GCC ATT CTT CAT GAG ATG CTT CAG CAG ATT TTC AAC     270  
76     His Ile Leu Ala Ile Leu His Glu Met Leu Gln Gln Ile Phe Asn     90  
271    CTC TTC AGG GCA GTT ATT TCT CTG GAT GGT TGG GAA GAA ATC CAA     315  
91     Leu Phe Arg Ala Val Ile Ser Leu Asp Gly Trp Glu Glu Ile Gln     105  
316    ATG GAT AGA TTC CTC TCT GAA CTT CAT CAA CAG CTG GAA TAC CTA     360  
106    Met Asp Arg Phe Leu Ser Glu Leu His Gln Gln Leu Glu Tyr Leu     120  
361    GAA ACA CTC ATA CGA CTG CAA GCT GAA CAG AGA AGT GGC ATC TTG     405  
121    Glu Thr Leu Ile Arg Leu Gln Ala Glu Gln Arg Ser Gly Ile Leu     135  
406    GGT AGT GAG AAC CTT AGG TTA CAG GTT AAA AGT TAC TTC CAA AGG     450  
136    Gly Ser Glu Asn Leu Arg Leu Gln Val Lys Ser Tyr Phe Gln Arg     150  
451    ATC CAT GAT TAC CTG GAA AGT CAG GAA TAC AGC AGC TGT GCC TGG     495  
151    Ile His Asp Tyr Leu Glu Ser Gln Glu Tyr Ser Ser Cys Ala Trp     165  
496    ACC ATT GTC CAG ATA GAA ATC AAC CGG TGT CTG TTC TTT ATG ATC     540  
166    Thr Ile Val Gln Ile Glu Ile Asn Arg Cys Leu Phe Phe Met Ile     180  
541    CAA CTC ACA GGA AAG CTG AGC AAA CAA GGA ATG GAT CCT TGA     582  
181    Gln Leu Thr Gly Lys Leu Ser Lys Gln Gly Met Asp Pro End

CGTTTGTCCTTACCTAGGATTCGAA

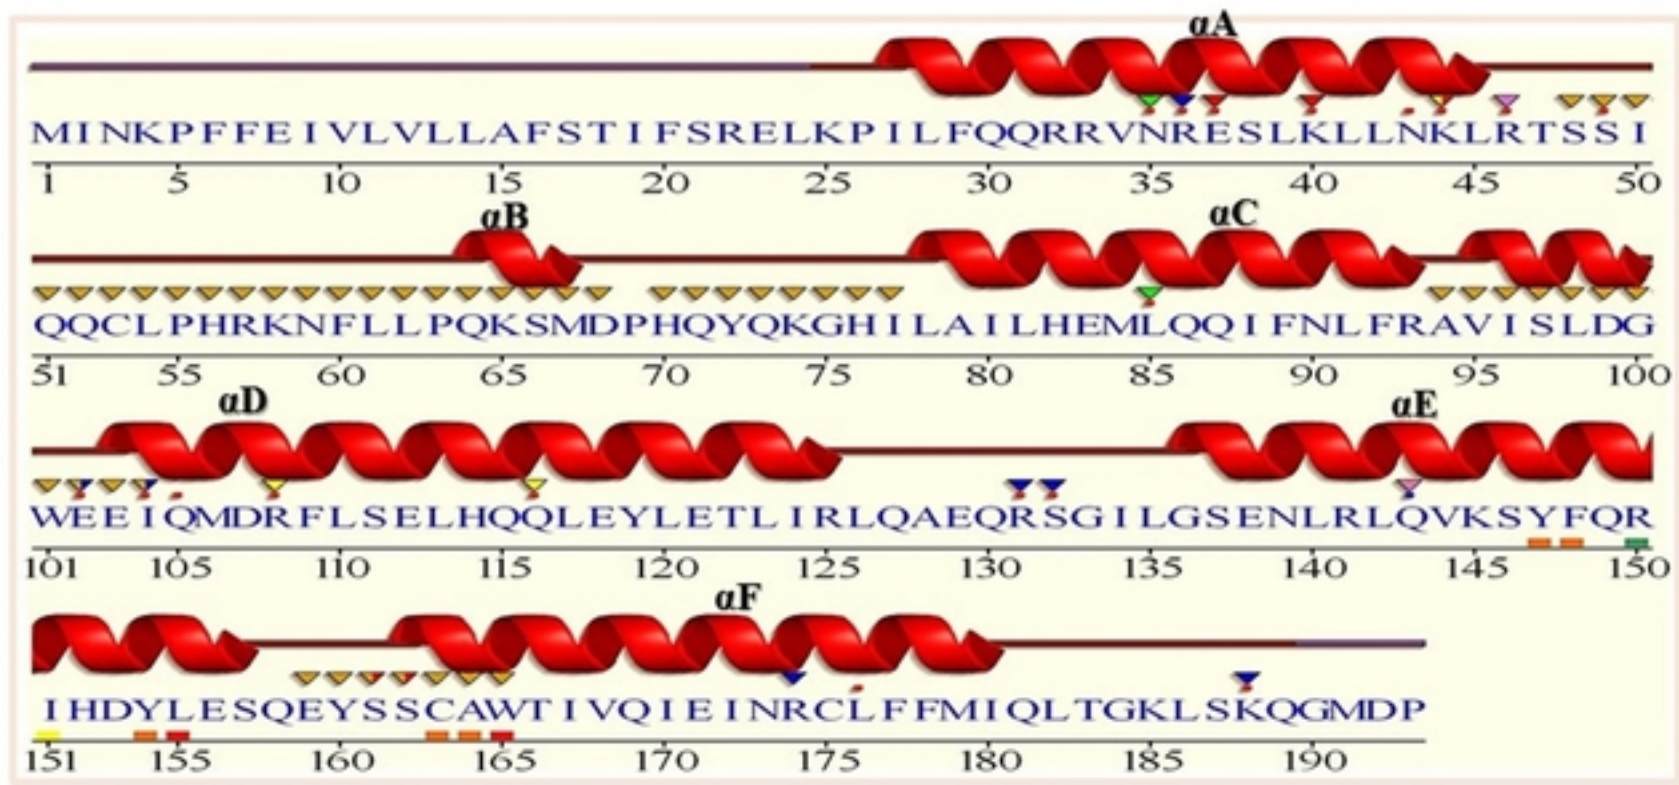

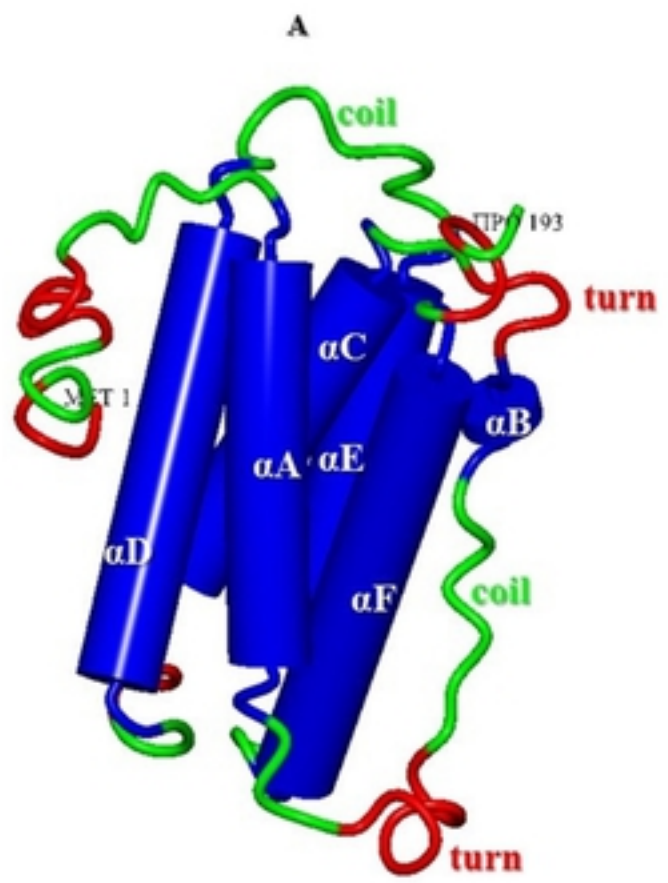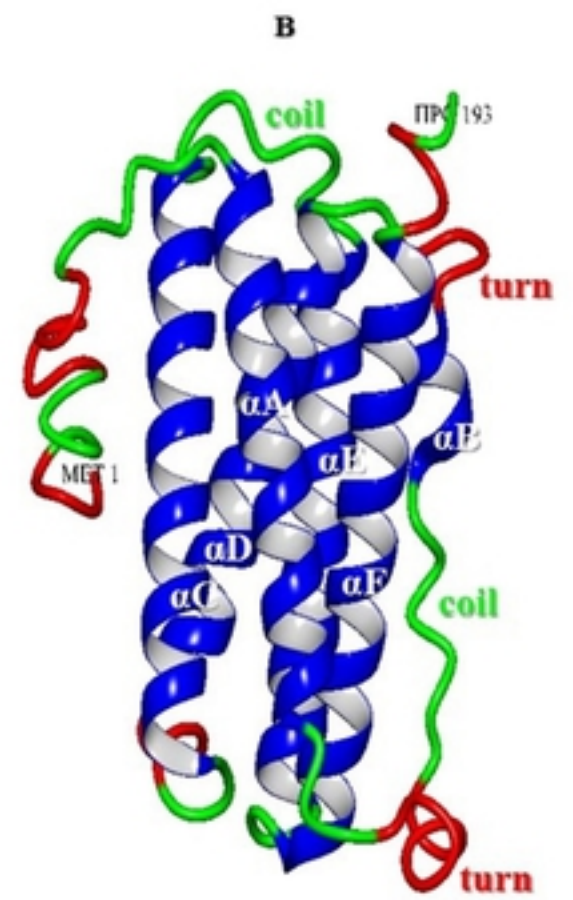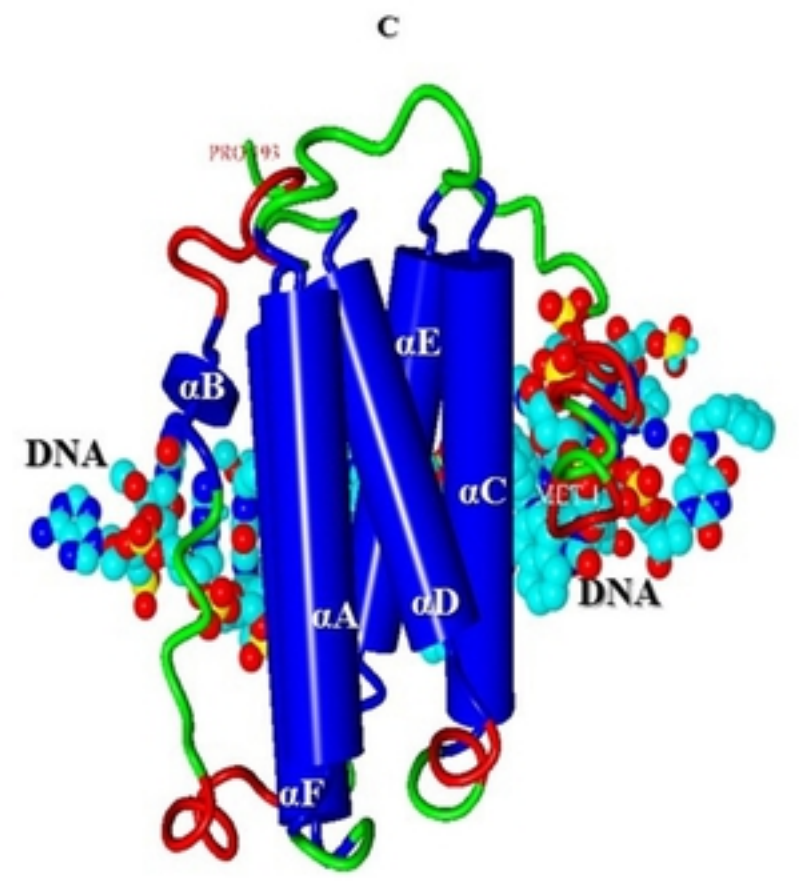



*C. dromedarius* IFN $\alpha$   
*H. sapiens* IFN $\alpha$ 2

|                            |            |         |         |       |                |       |
|----------------------------|------------|---------|---------|-------|----------------|-------|
| MINKPFFEIVLVLLAFSTIFSRE    | LKPILFQQR  | RVNRESL | KLLNK   | LRTSS | IQQCLP         | 55    |
| -----                      | CDLPQTHSL  | G-SRRTL | MLLA    | MRKIS | LFSCLK         | 31    |
| HRKNFLLPQKSMDPHQYQKGHI     | LAILHEML   | QQIFNLF | RAVIS   | LDGWE | EIQMDRFL       | 110   |
| DRHDFGFPQEEF-GNQFQKAET     | IPVLHEMI   | QQIFNLF | STKD    | SSA   | AWDETLLDKFY    | 85    |
| SELHQQLEYLETLIR            | LQAEQRSGIL | GSENLRL | QVKS    | YFQRI | HDYLESQEYSSCAW | 165   |
| TELYQQLENDLEACVI           | QGVGV      | TETPL   | MKEDSIL | AVRKY | FQRITLYLKEKKYS | 140   |
| TIVQIEINRCLFFMIQLTGKLSKQGM | DP         |         |         |       |                | 193   |
| EVVRAEIMRSFSLSTNLQE        | SLRSKE     | ---     |         |       |                | A 165 |

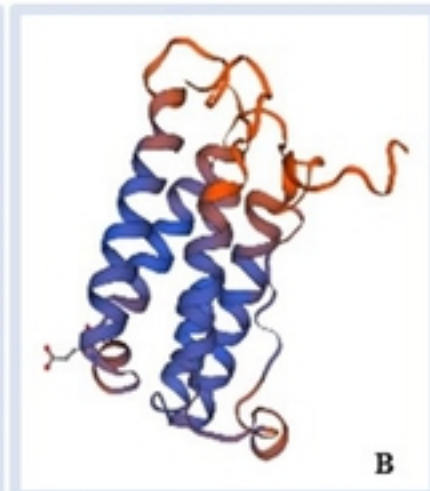

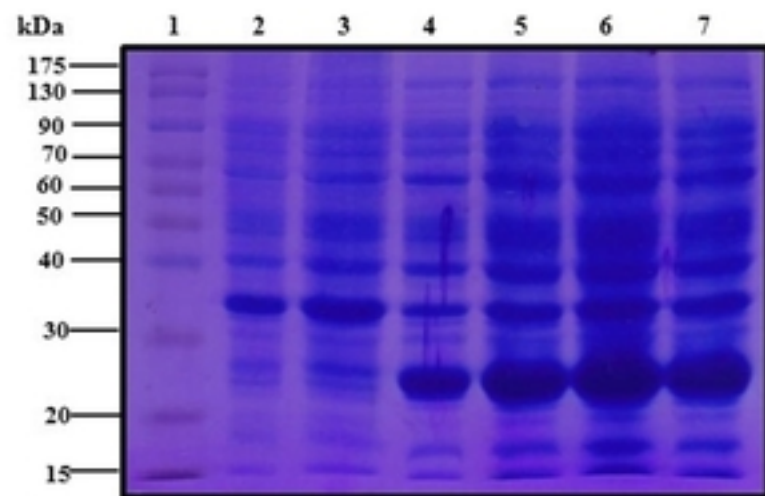

A

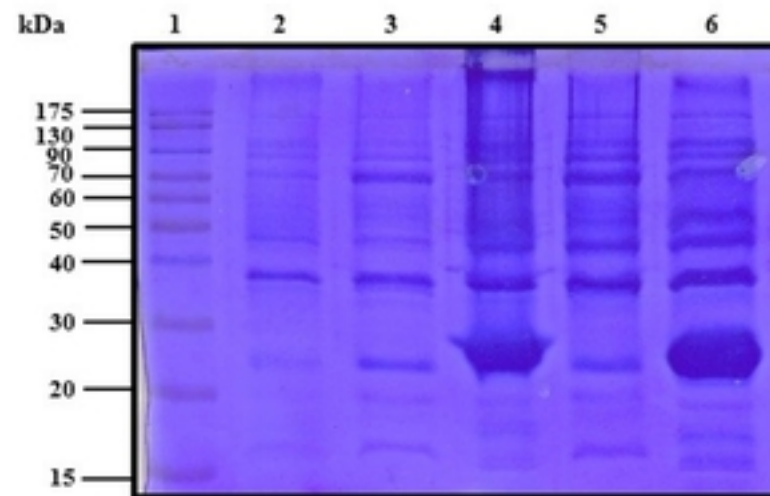

B

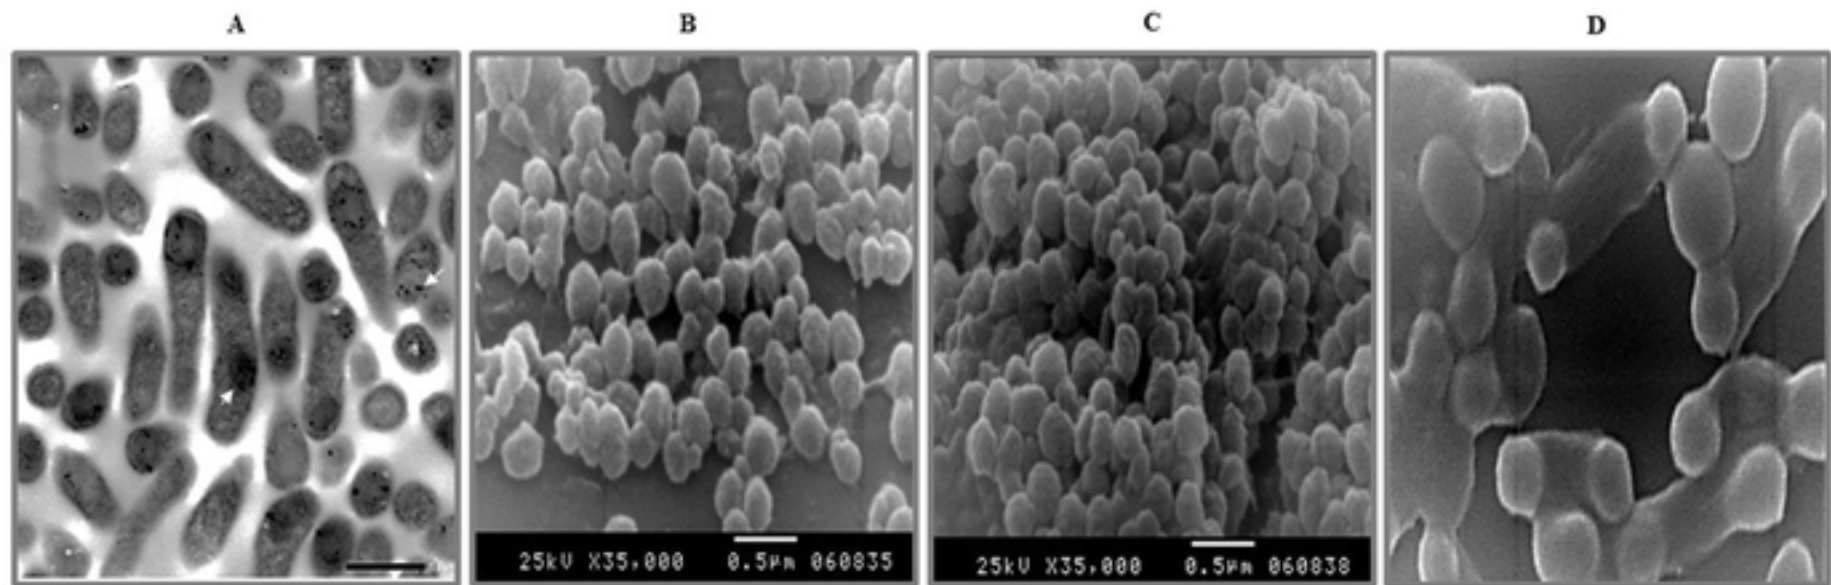

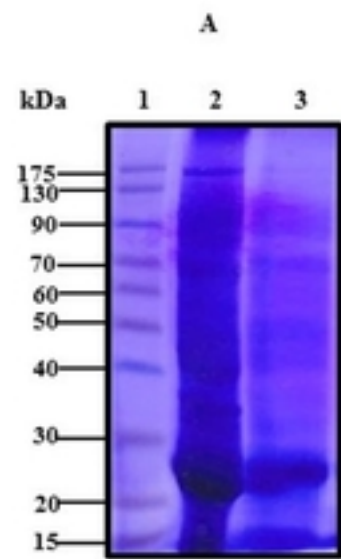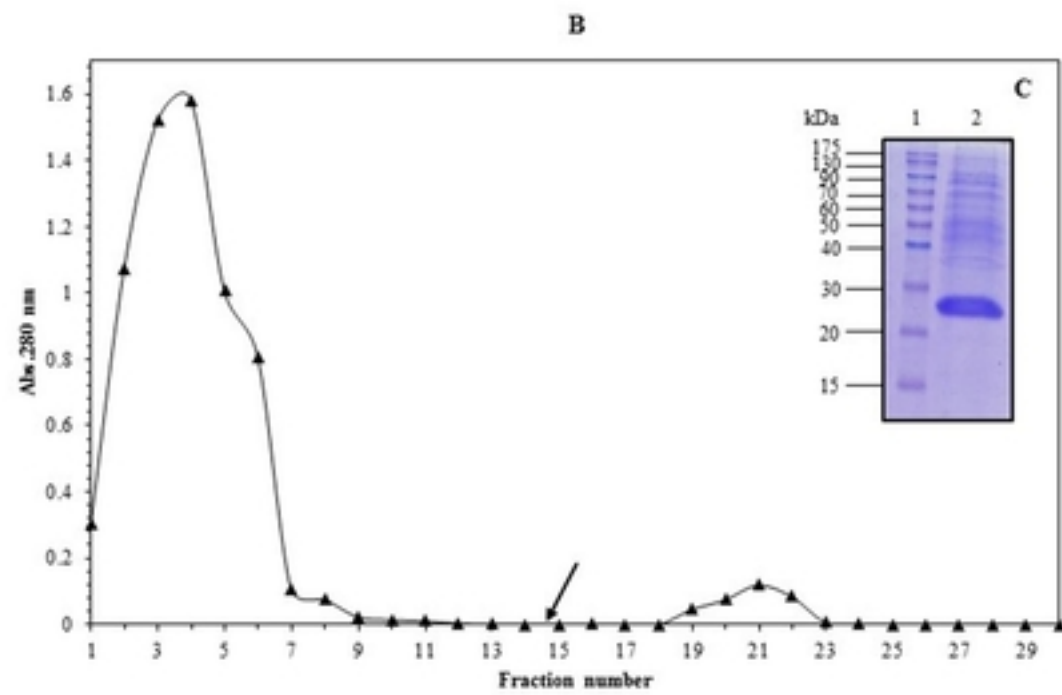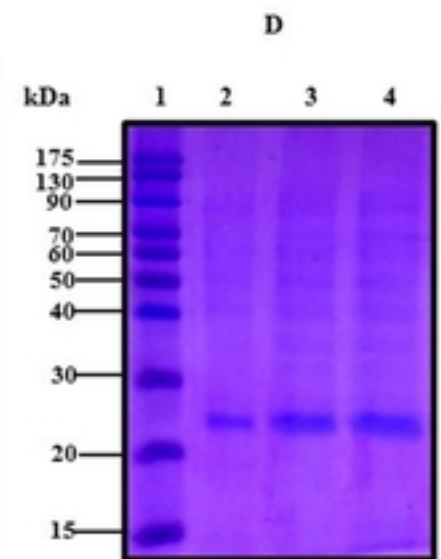

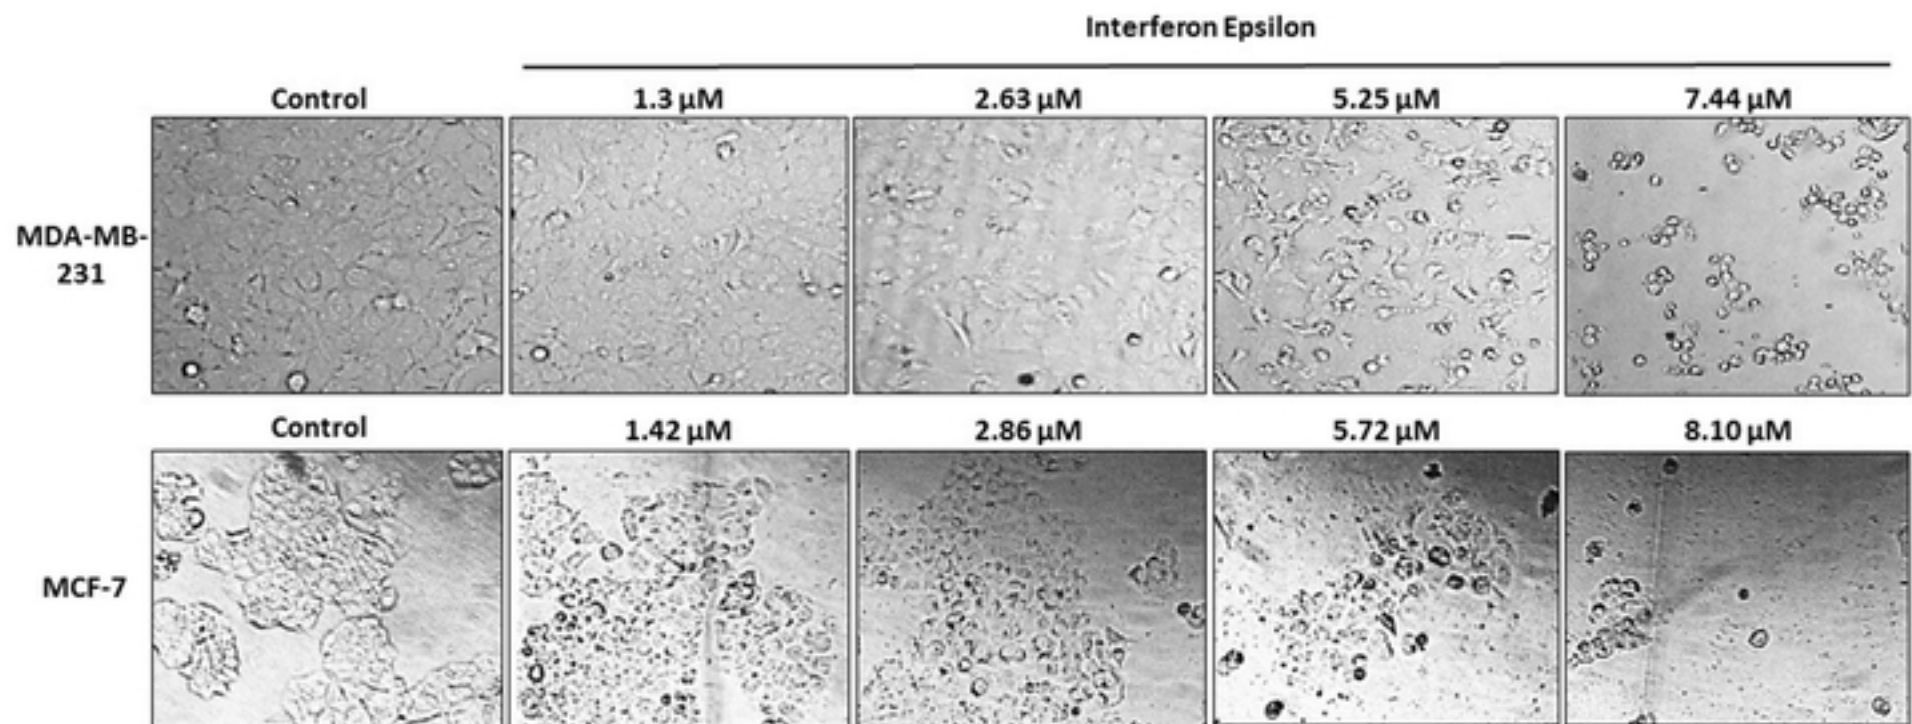



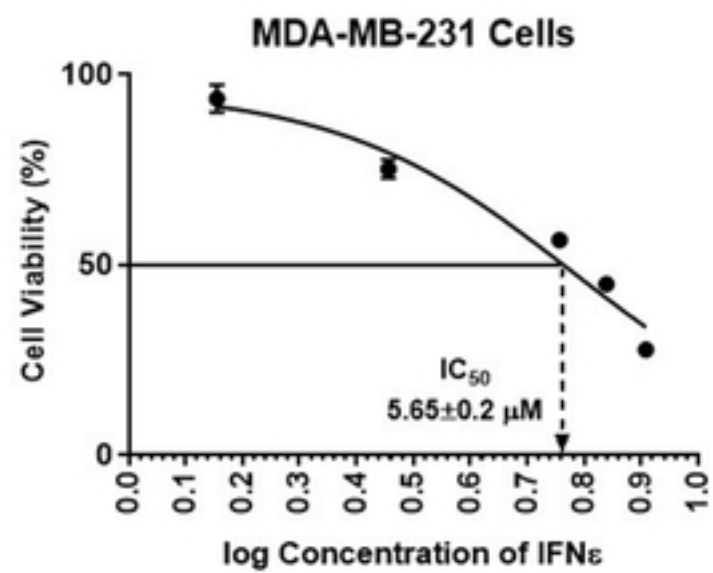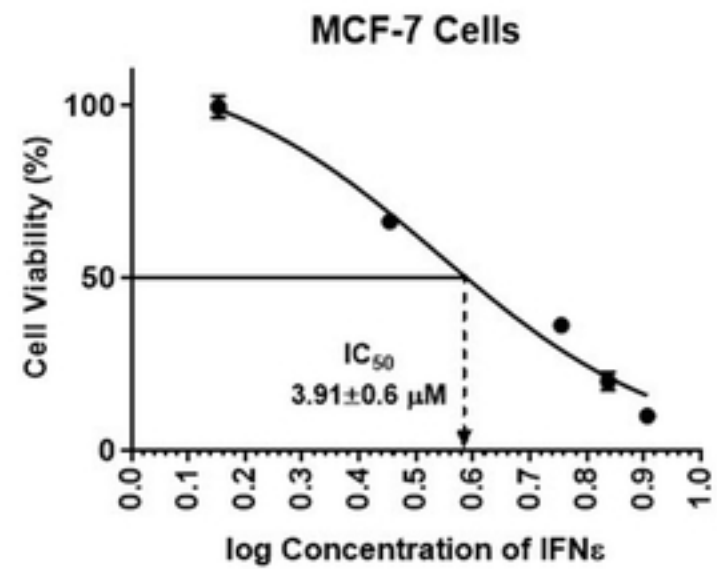

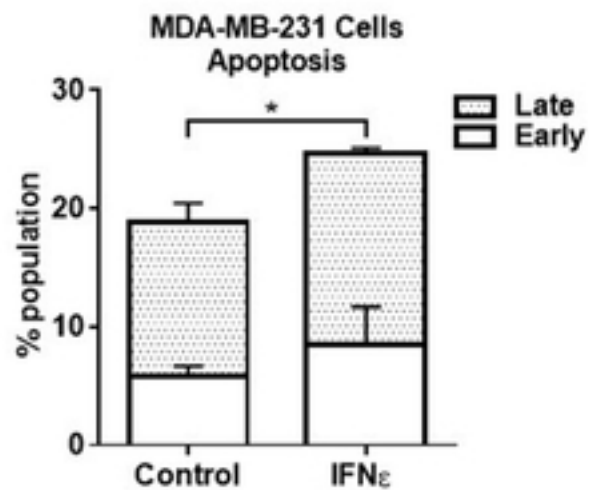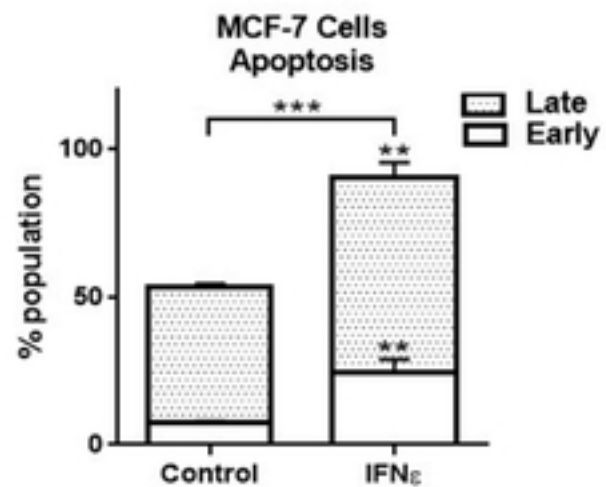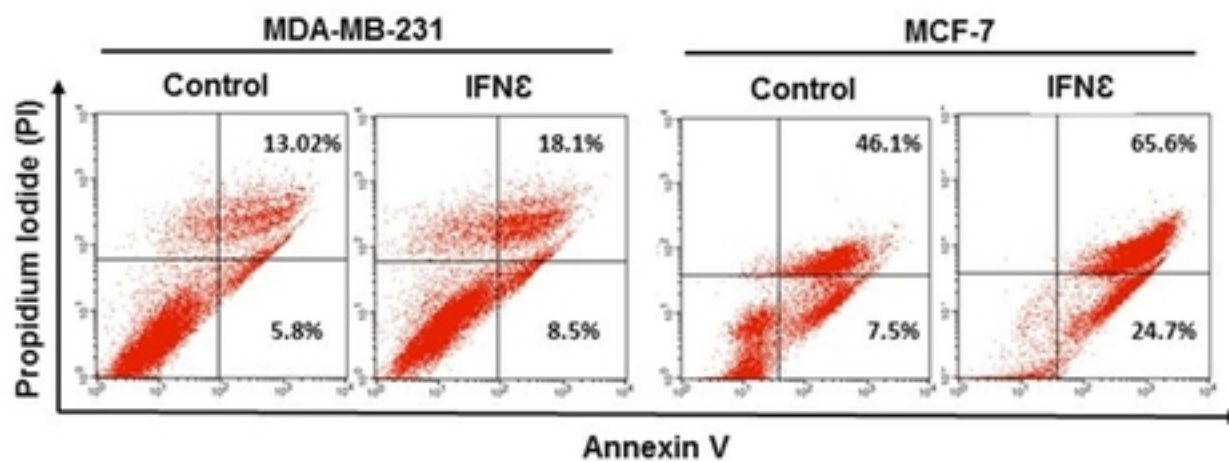

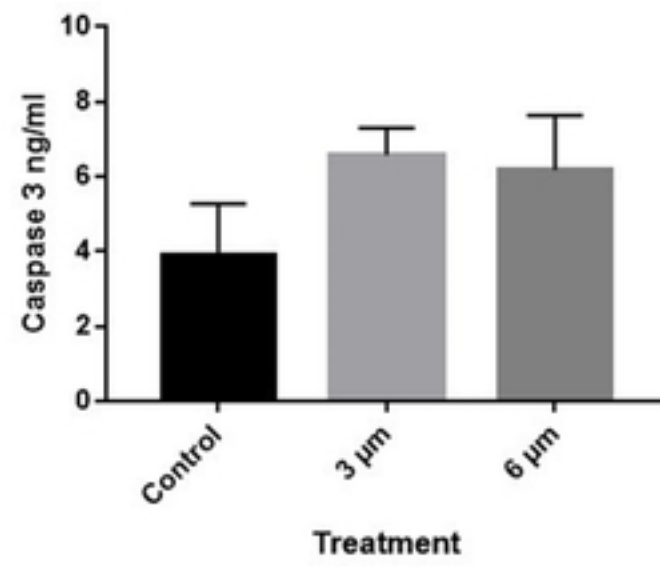

Source: https://www.biorxiv.org/content/10.1101/568329v1.full.pdf
